# Supplementary material for: Alkylammoniotrifluoroborate functionalized polystyrenes: polymeric pre-catalysts for the metal-free borylation of heteroarenes
Source: Royal Society of Chemistry journal article supplement (doi:10.1039/c9dt00484j), 2019-01-01
Supplement: c9dt00484j1.pdf [file c9dt00484j1.pdf]

## ***Supporting Information:***

# Alkylammoniotrifluoroborate functionalized polystyrenes: polymeric pre-catalysts for the metal-free borylation of heteroarenes

*Nicolas Bouchard, Frédéric-Georges Fontaine\**

Département de Chimie, Université Laval, 1045 Avenue de la Médecine,  
Québec (Québec), Canada, G1V 0A6.

Submitted to *Dalton Transactions*

### Table of Contents

|                                                                                     |    |
|-------------------------------------------------------------------------------------|----|
| 1.1 Synthesis of compounds <b>1-R</b> .....                                         | 2  |
| 1.2 Synthesis of compounds <b>2-R (2-Me, 2-Et and 2-Pip)</b> .....                  | 5  |
| 1.3 Synthesis of compounds <b>3-R (3-Me, 3-Et and 3-Pip)</b> .....                  | 14 |
| 1.4 Synthesis of polymers <b>P-R</b> . ....                                         | 26 |
| 1.5 General procedure for the metal-free catalytic borylation of heteroarenes. .... | 46 |
| 1.6 Crystallographic details .....                                                  | 52 |
| 1.7 SEC-GPC data. ....                                                              | 55 |

## 1.1 Synthesis of compounds 1-R

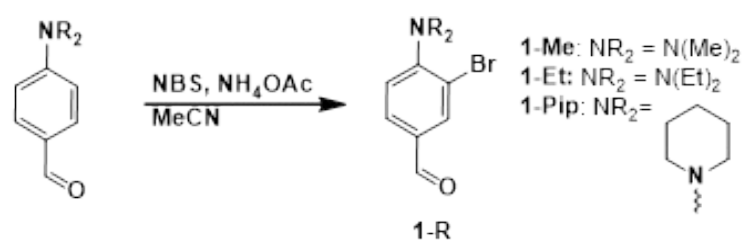

Scheme S1 : General synthesis of compounds **1-R** as reported by Reddy et al.

Following reported literature procedures<sup>1</sup>, compound **1-R** could be synthesized and purified using column chromatography with methylene chloride as the eluant. Their structures were confirmed by <sup>1</sup>H and <sup>13</sup>C NMR. NMR spectra were in accordance with data from the literature<sup>1</sup>.

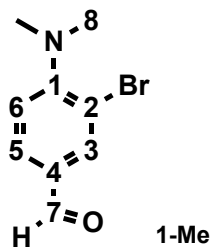

Isolated yield: 90 %, pale yellow oil

**<sup>1</sup>H-NMR (CDCl<sub>3</sub>, 500 MHz):** δ 9.81 (s, 1H, H7); 8.03 (d, 1H, <sup>3</sup>J<sub>H-H</sub>=2Hz, H3); 7.73 (dd, 1H, J<sub>H-H</sub>=2Hz, 8 Hz), H5); 7.07(d, 1H, J<sub>H-H</sub> = 8Hz, H6); 2.96 (s, 6H, H8).

**<sup>13</sup>C {<sup>1</sup>H} (CDCl<sub>3</sub>, 126 MHz):** δ 189.6 (s, 1C, C7); 156.6 (s, 1C, C4), 136.1, 131.0, 126.9, 119.4, 116.6 (s, 5C, C1, C2, C3, C5 and C6); 44.1(s, 2C, C8).

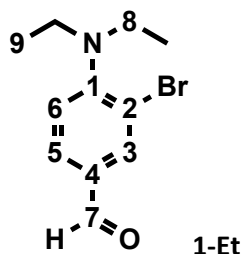

Isolated Yield: 55 %, brown oil

**<sup>1</sup>H NMR (CDCl<sub>3</sub>, 400 MHz):** δ 9.82 (s, 1H, H7); 8.06 (d, 1H, J<sub>H-H</sub>=2Hz, H3); 7.73 (dd, 1H, J<sub>H-H</sub>=2Hz, 8 Hz), H5); 7.09 (d, 1H, J<sub>H-H</sub> = 8Hz, H6)); 3.28 (q, J<sub>H-H</sub> = 7Hz, 4H, H8); 1.11(t, J<sub>H-H</sub> = 7Hz, 6H, H9).

**<sup>13</sup>C {<sup>1</sup>H} NMR (CDCl<sub>3</sub>, 126 MHz):** δ 189.6 (s, 1C, C7); 156.1 (s, 1C, C4), 136.1, 131.2 129.2, 122.2, 119.3 (s, 5C, C1, C2, C3, C5 and C6); 46.0 (s, 2C, C8), 12.4 (s, 2C, C9).

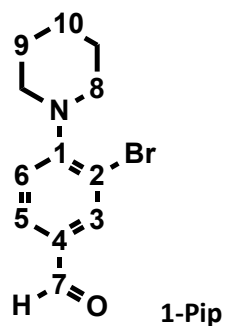

Isolated yield: 45 %, red oil

**<sup>1</sup>H NMR (CDCl<sub>3</sub>, 400 MHz):** δ 9.82 (s, 1H, H7); 8.04 (d, 1H, J<sub>H-H</sub>=2Hz, H3); 7.74 (dd, 1H, J<sub>H-H</sub>=2Hz, 8 Hz, H5); 7.09 (d, 1H, J<sub>H-H</sub> = 8Hz, H6); 3.10 (t, J<sub>H-H</sub> = 7Hz, 4H, H8); 1.79-1.74(m, 4H, H9); 1.65-1.61(m, 2H, H10).

**<sup>13</sup>C {<sup>1</sup>H} NMR (CDCl<sub>3</sub>, 126 MHz):** δ 190.3 (s, 1C, C7); 157.8 (s, 1C, C4), 135.5, 131.3, 130.6, 120.0, 119.3 (s, 5C, C1, C2, C3, C5 and C6); 52.3 (s, 2C, C8), 26.2 (s, 2C, C9), 24.0 (s, 1C, C10).

## 1.2 Synthesis of compounds 2-R (2-Me, 2-Et and 2-Pip).

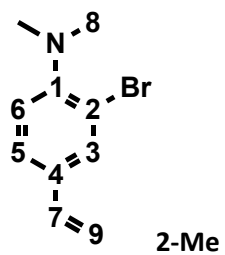

Isolated Yield: 89 % (60 % after distillation) of a clear oil.

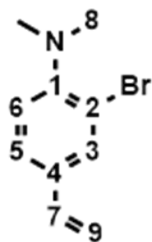

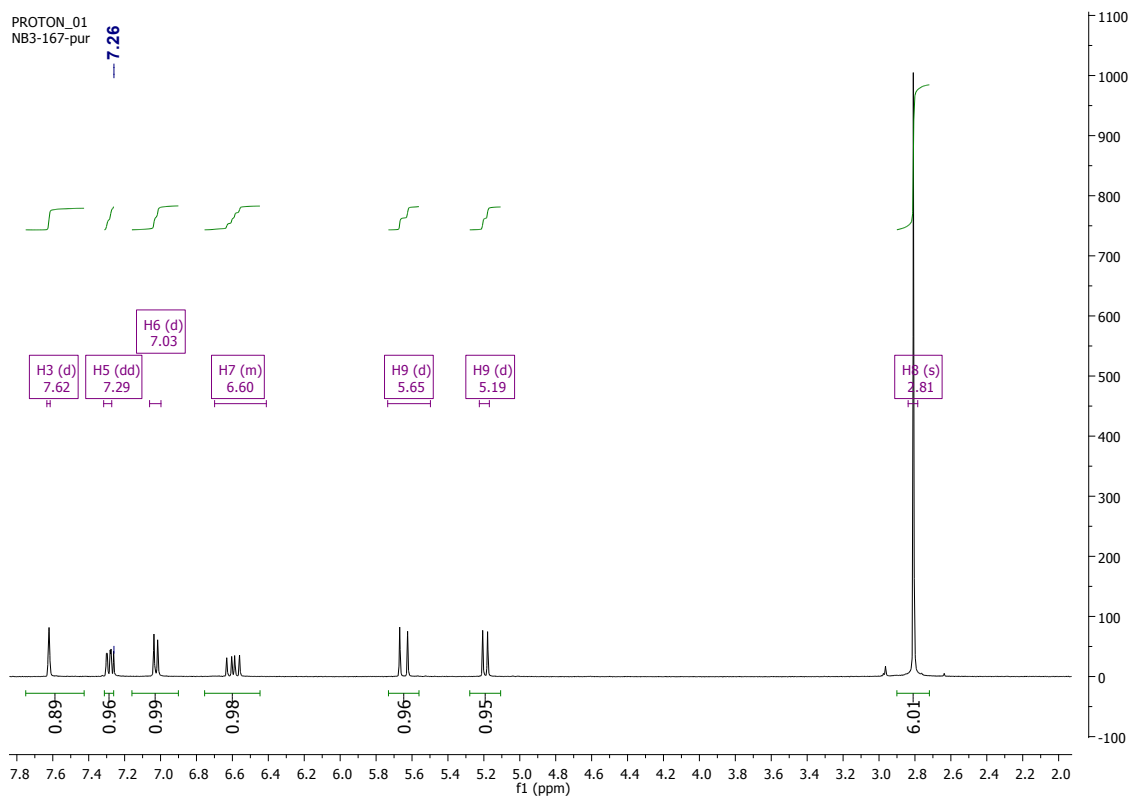

**Figure S1.**  $^1\text{H}$  NMR of compound **2-Me** ( $\text{CDCl}_3$ , 500 MHz).

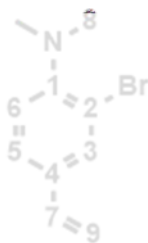

CARBON\_01  
2-Me\_13C

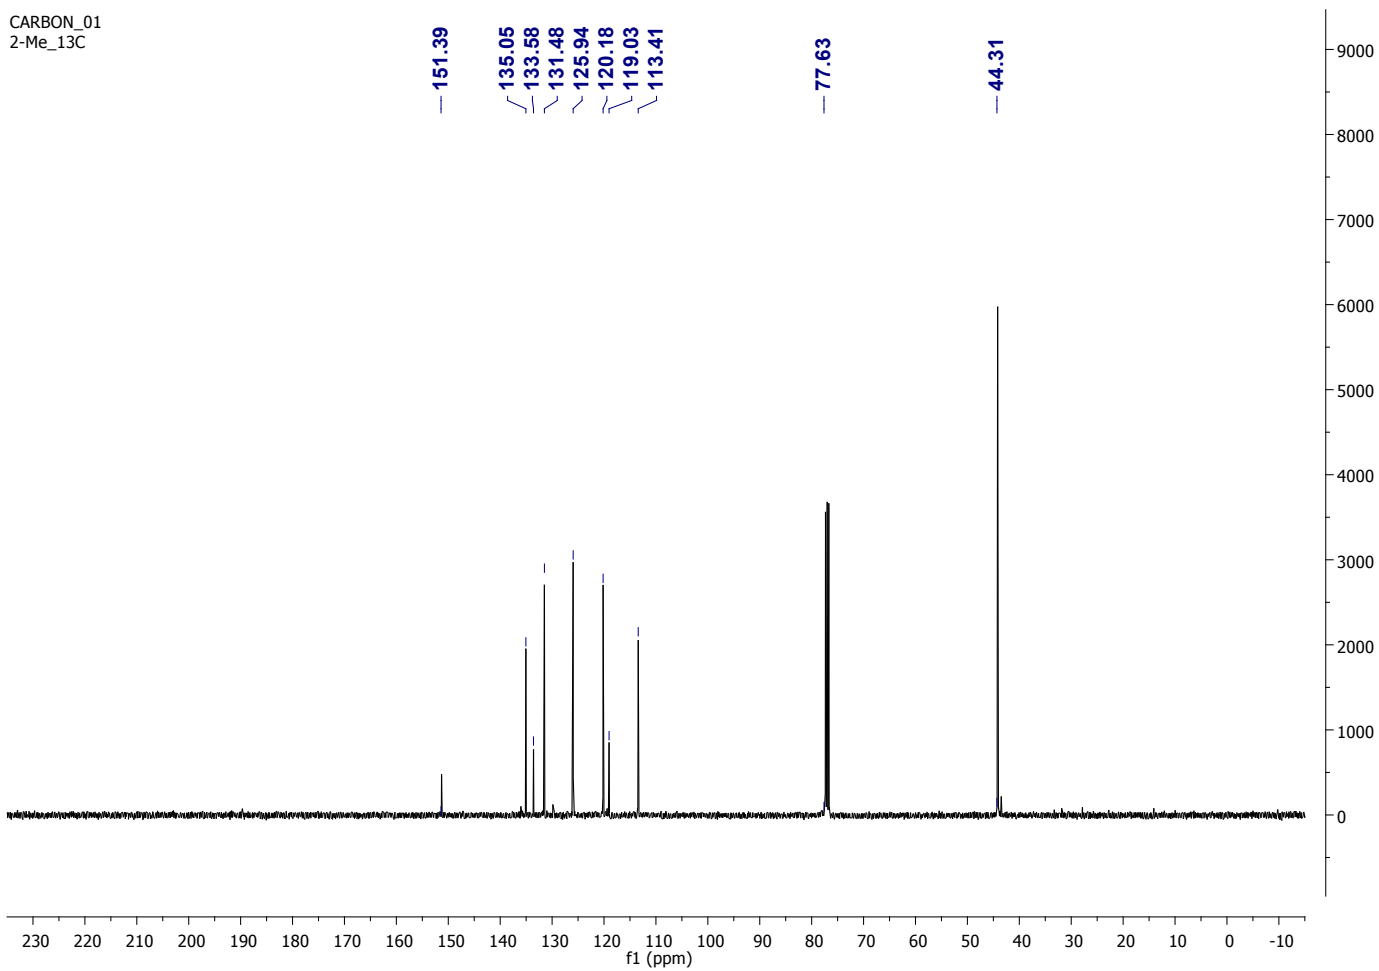

Figure S2.  $^{13}\text{C}$   $\{^1\text{H}\}$  NMR of 2-Me (126 MHz,  $\text{CDCl}_3$ )

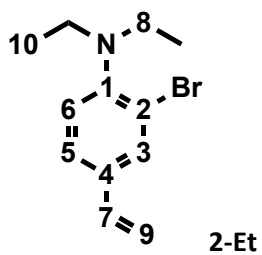

Isolated yield: 83% (55 % by vacuum distillation) of a clear oil.





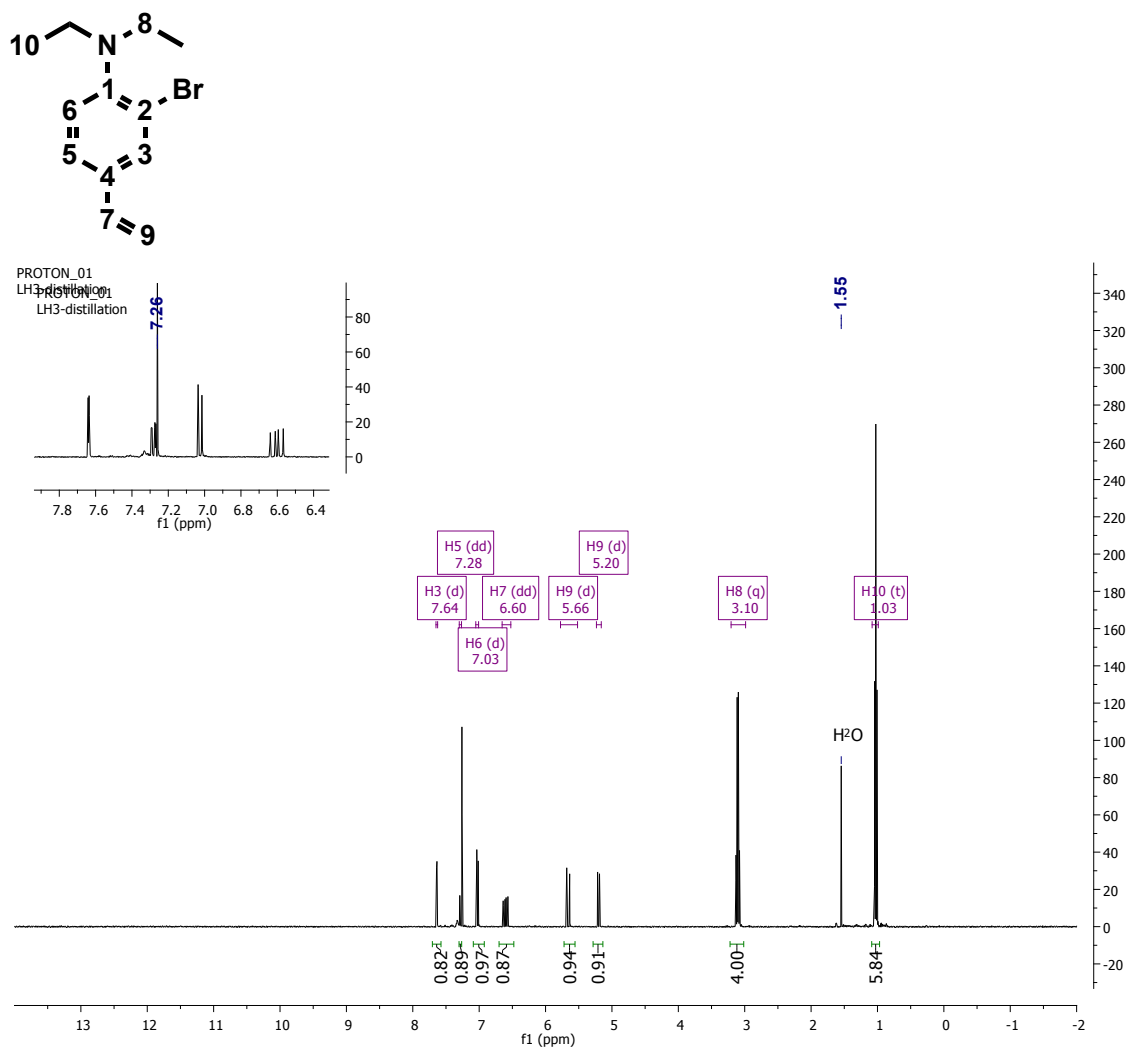

Figure S3 : <sup>1</sup>H NMR of 2-Et (400 MHz, CDCl<sub>3</sub>).

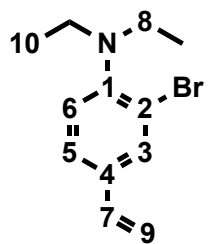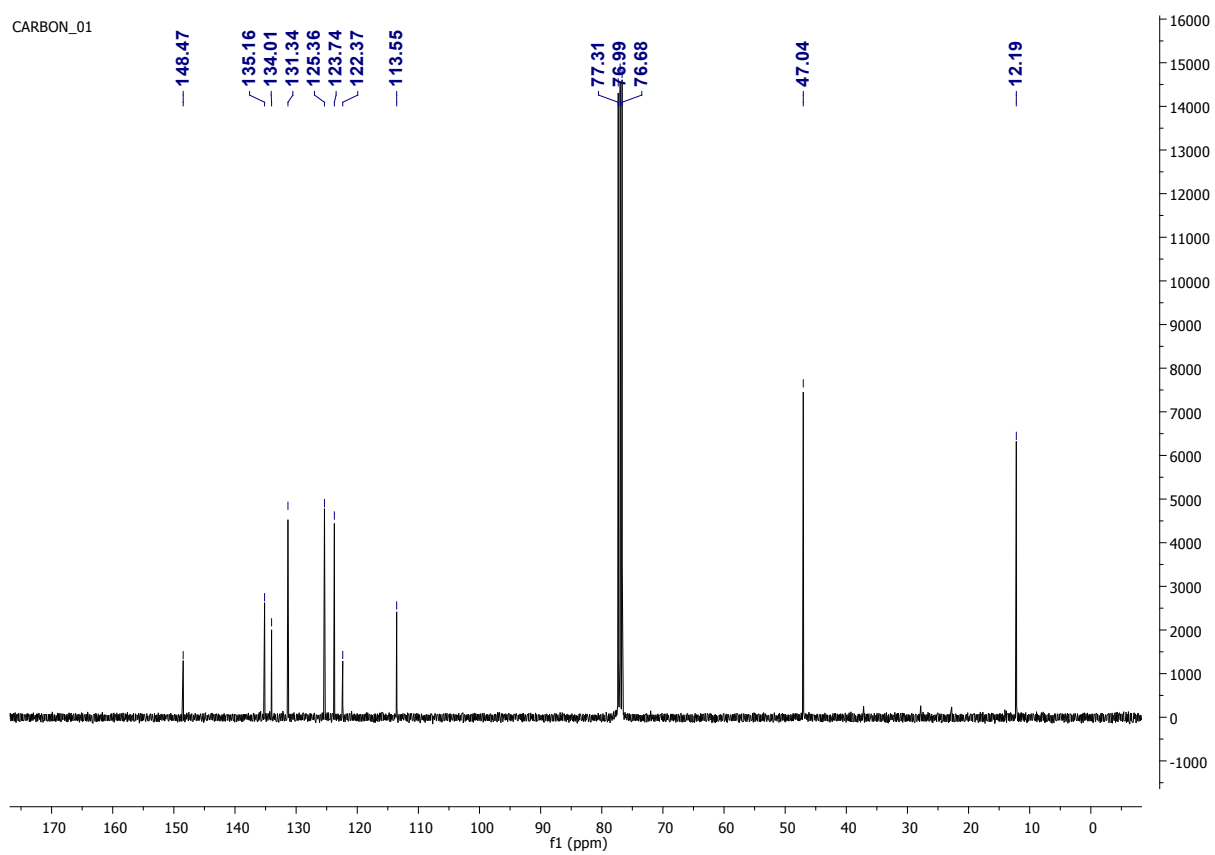

Figure S4.  $^{13}\text{C}$  [ $^1\text{H}$ ] NMR of 2-Et (126 MHz,  $\text{CDCl}_3$ ).

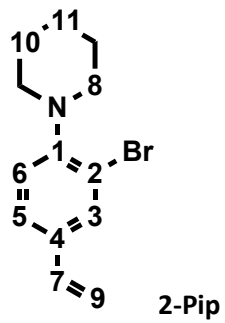

Isolated yield: 61 %, deep red oil.

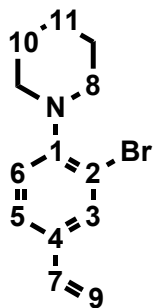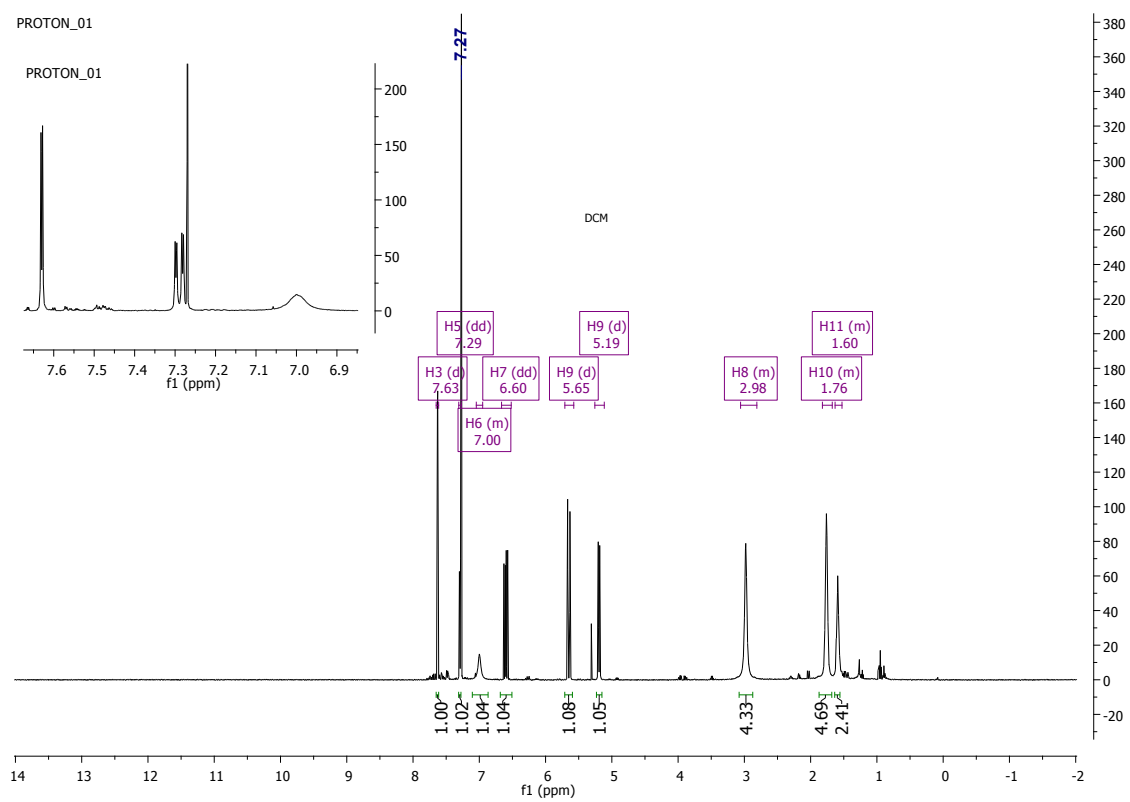

Figure S5.  $^1\text{H}$  NMR of compound 2-Pip ( $\text{CDCl}_3$ , 400 MHz).

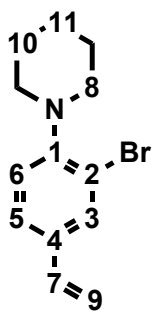

CARBON\_01

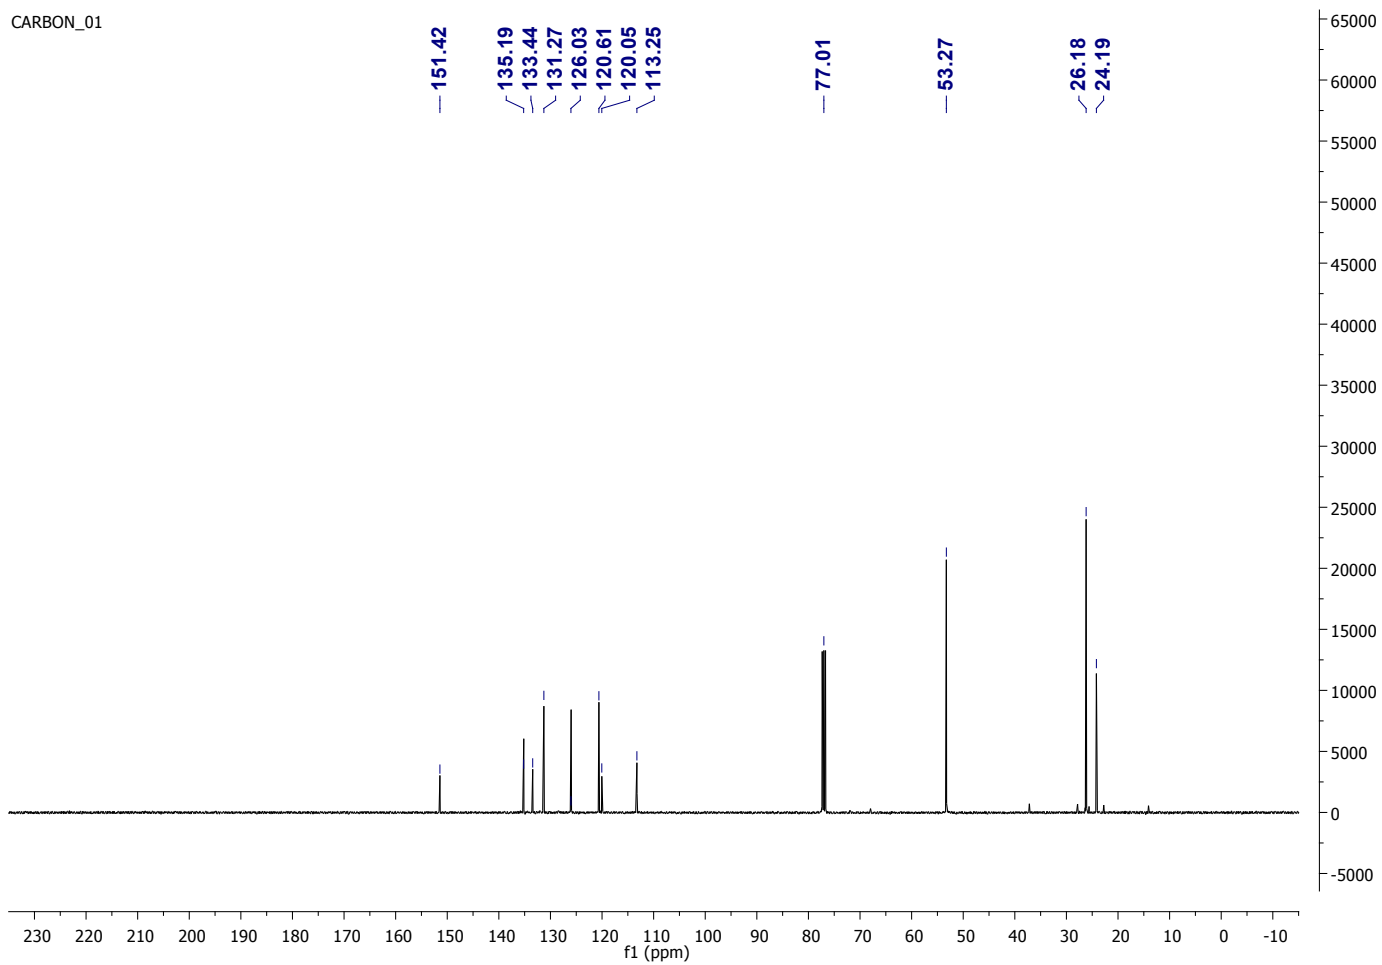

Figure S6.  $^{13}\text{C}\{^1\text{H}\}$  NMR of compound **2-Pip** ( $\text{CDCl}_3$ , 126 MHz).

### 1.3 Synthesis of compounds 3-R (3-Me, 3-Et and 3-Pip).

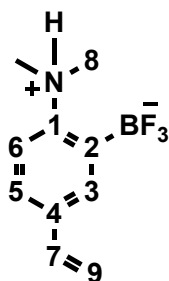

PROTON\_01

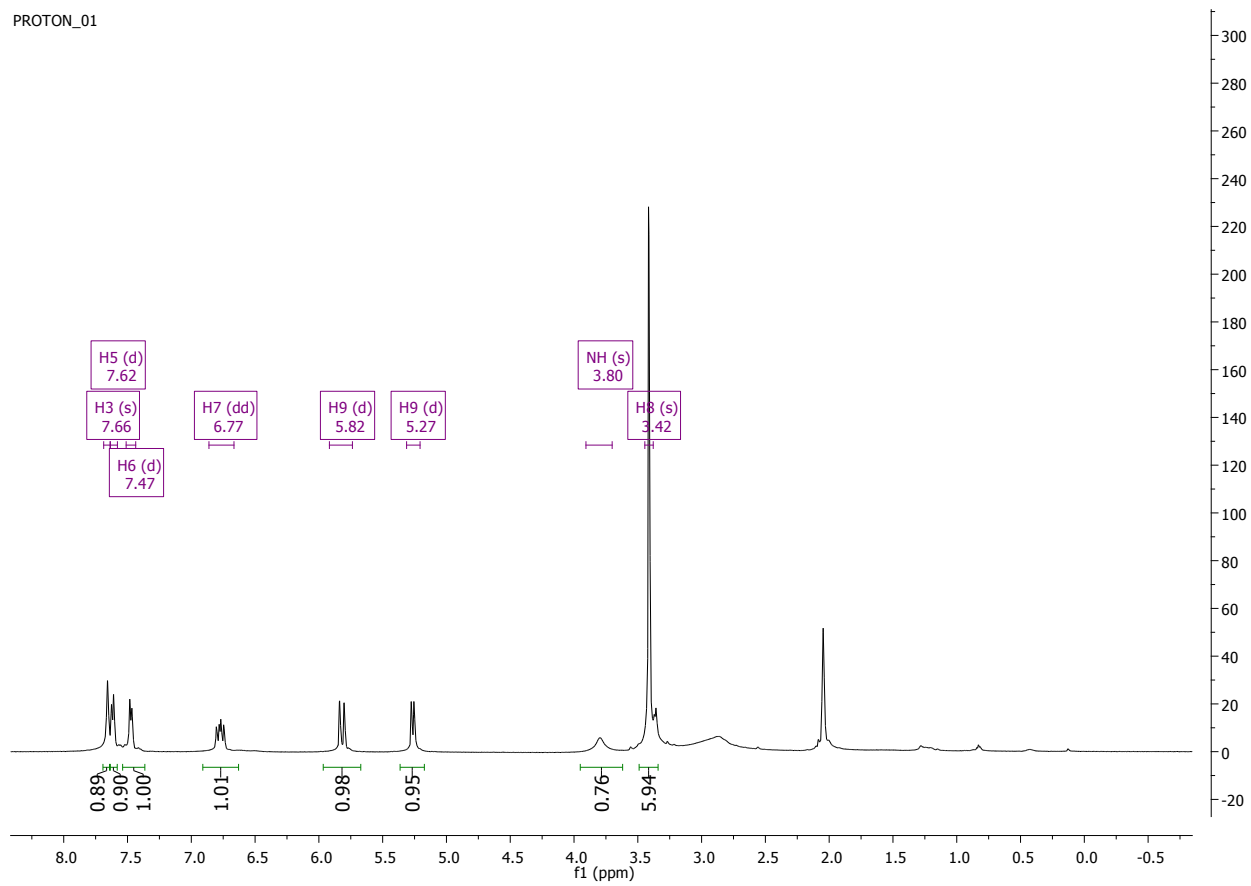

Figure S7.  $^1\text{H}$  NMR of 3-Me (acetone- $d_6$ , 500 MHz).

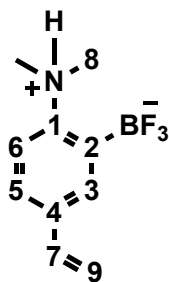

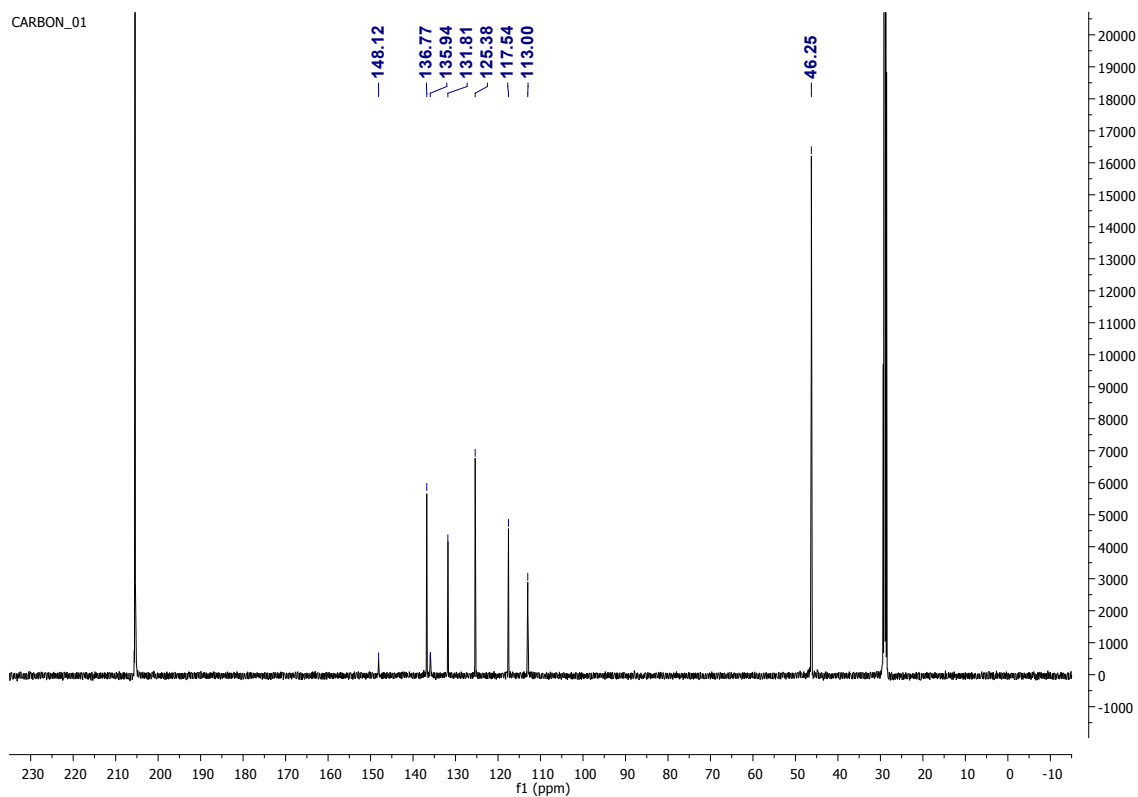

Figure S8.  $^{13}\text{C}$   $\{^1\text{H}\}$  NMR of **3-Me** (acetone- $d_6$ , 126 MHz).

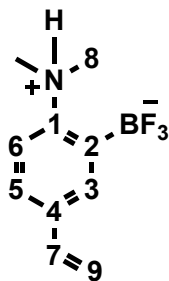



FLUORINE\_01

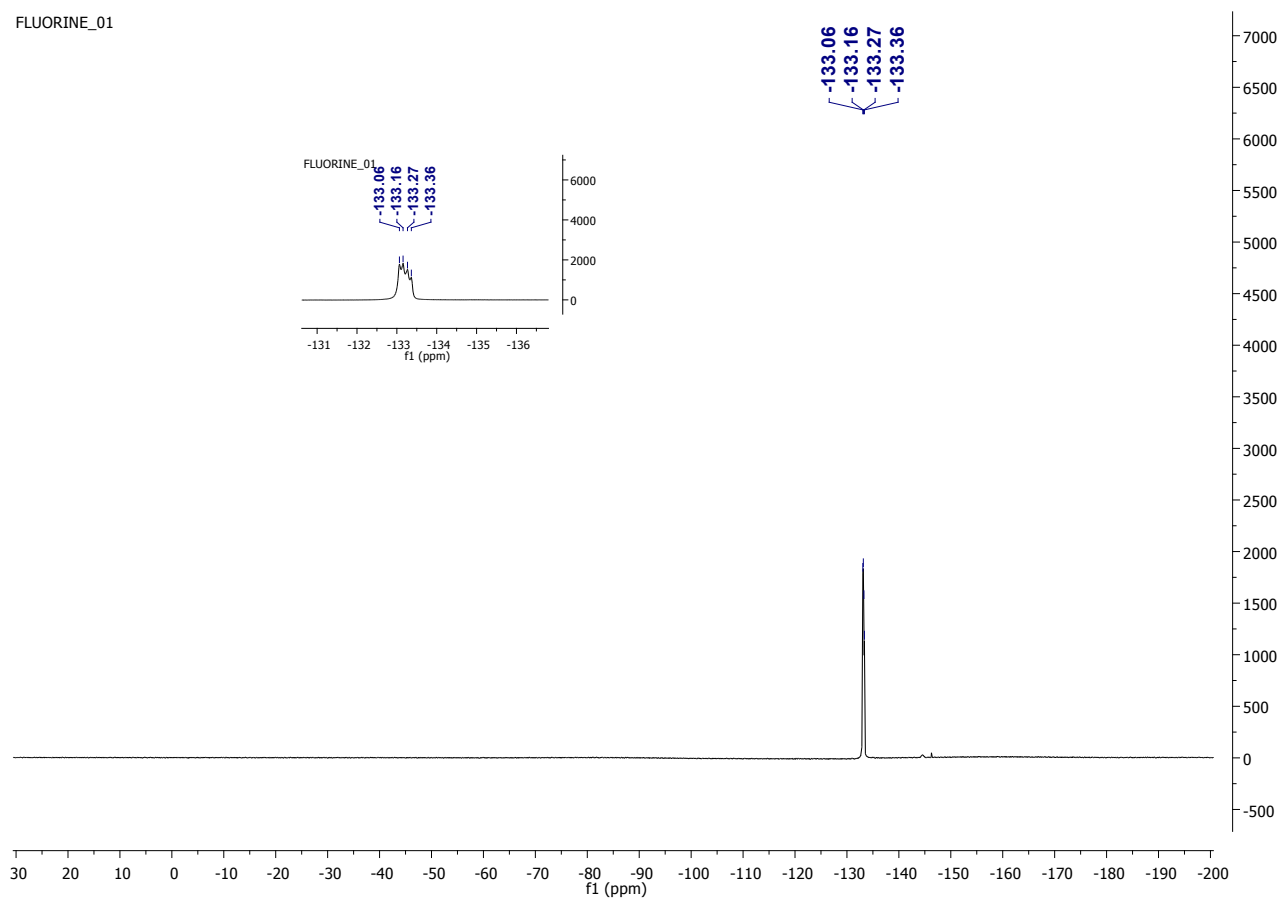

**Figure S9.**  $^{19}\text{F}$  NMR of compound **3-Me** ( $\text{acetone-}d_6$ , 470 MHz).

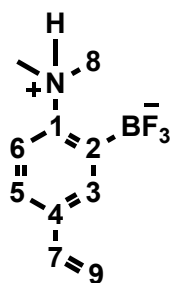

# <sup>11</sup>B NMR of compound 3-Me.

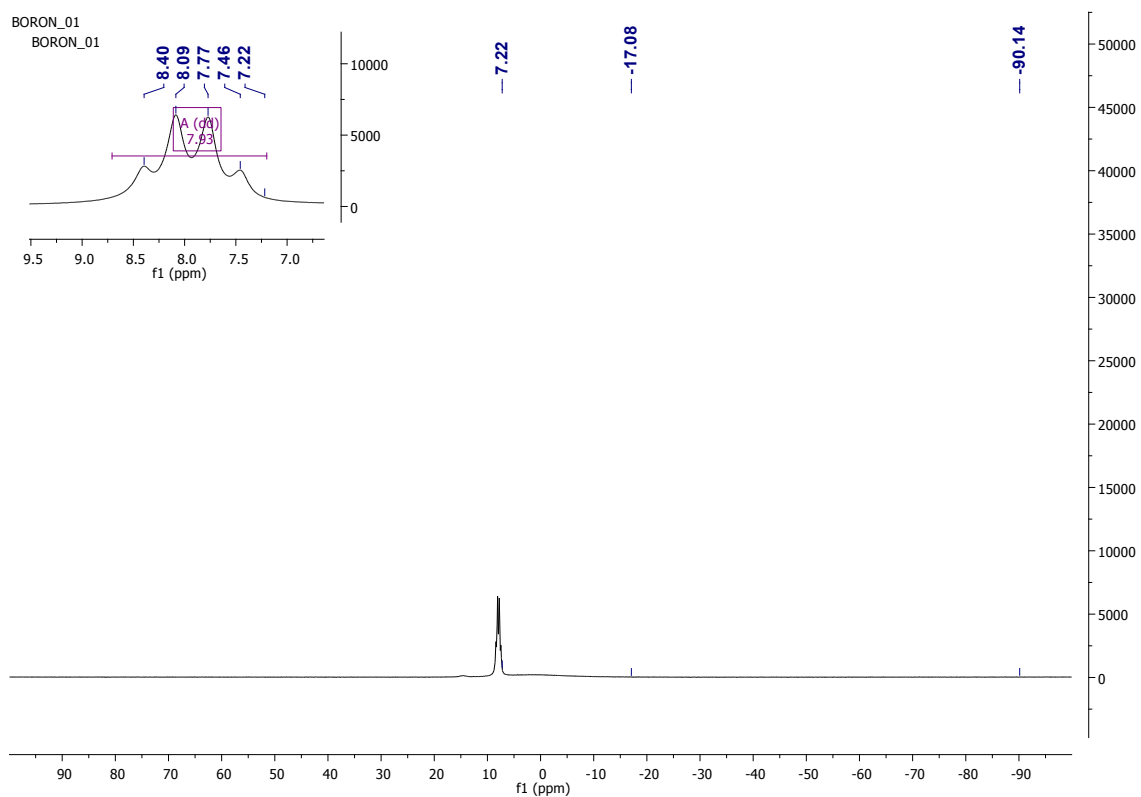

Figure S10. <sup>11</sup>B {<sup>1</sup>H} NMR of 3-Me (acetone-d<sub>6</sub>, 160 MHz).

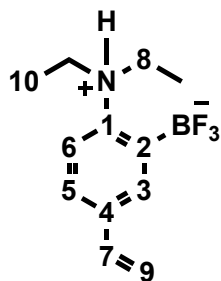

PROTON\_01  
NB4-2-CDCL3HSQCC

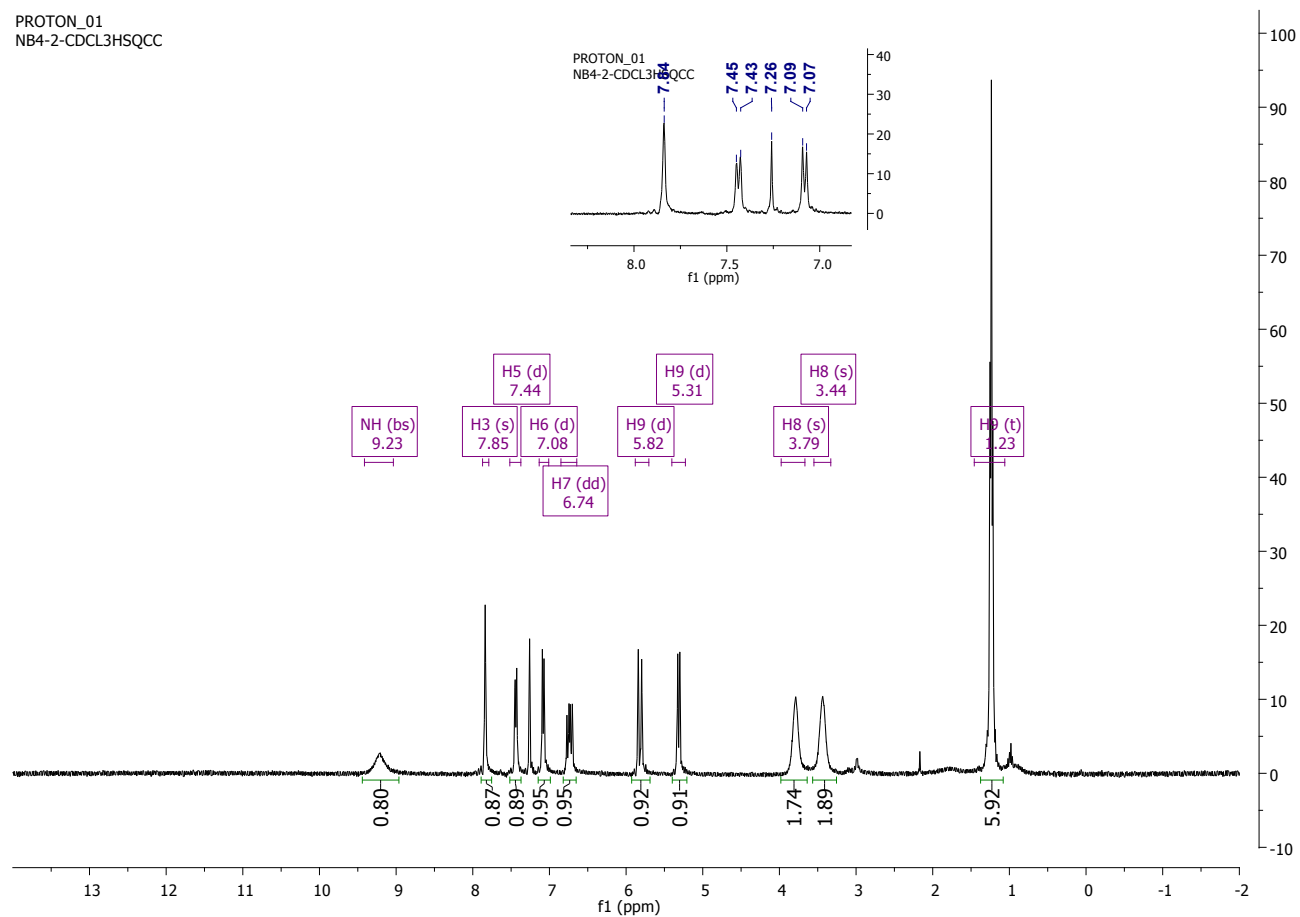

Figure S11.  $^1\text{H}$  NMR of compound **3-Et** ( $\text{CDCl}_3$ , 500MHz).

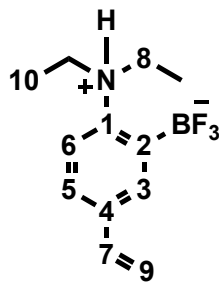

CARBON\_01

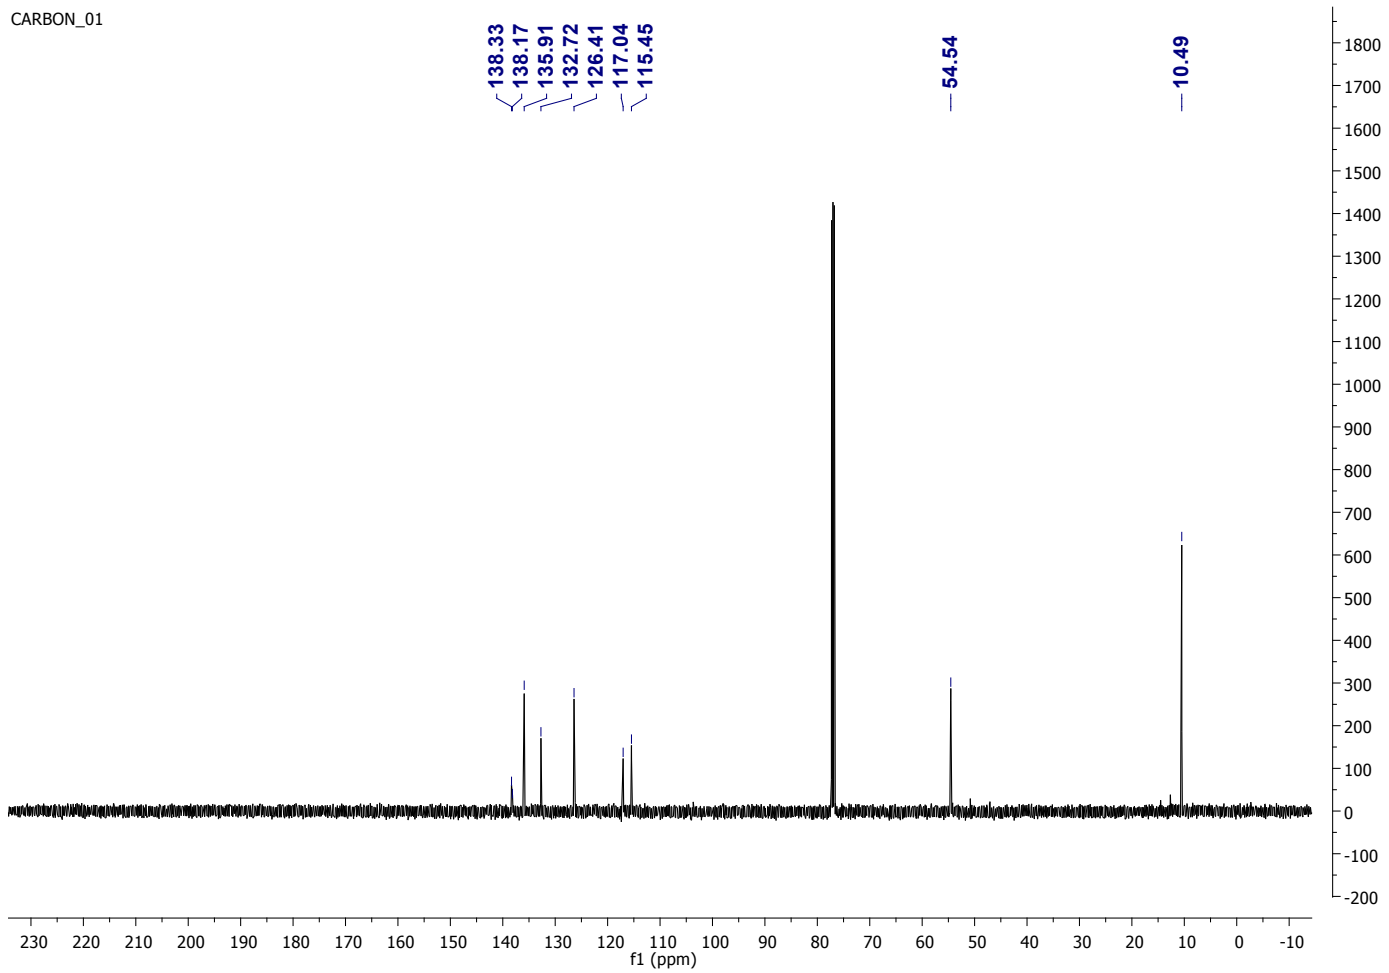

Figure S12.  $^{13}\text{C}$   $\{^1\text{H}\}$  NMR ( $\text{CDCl}_3$ , 126 MHz) of 3-Et.

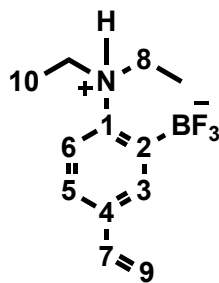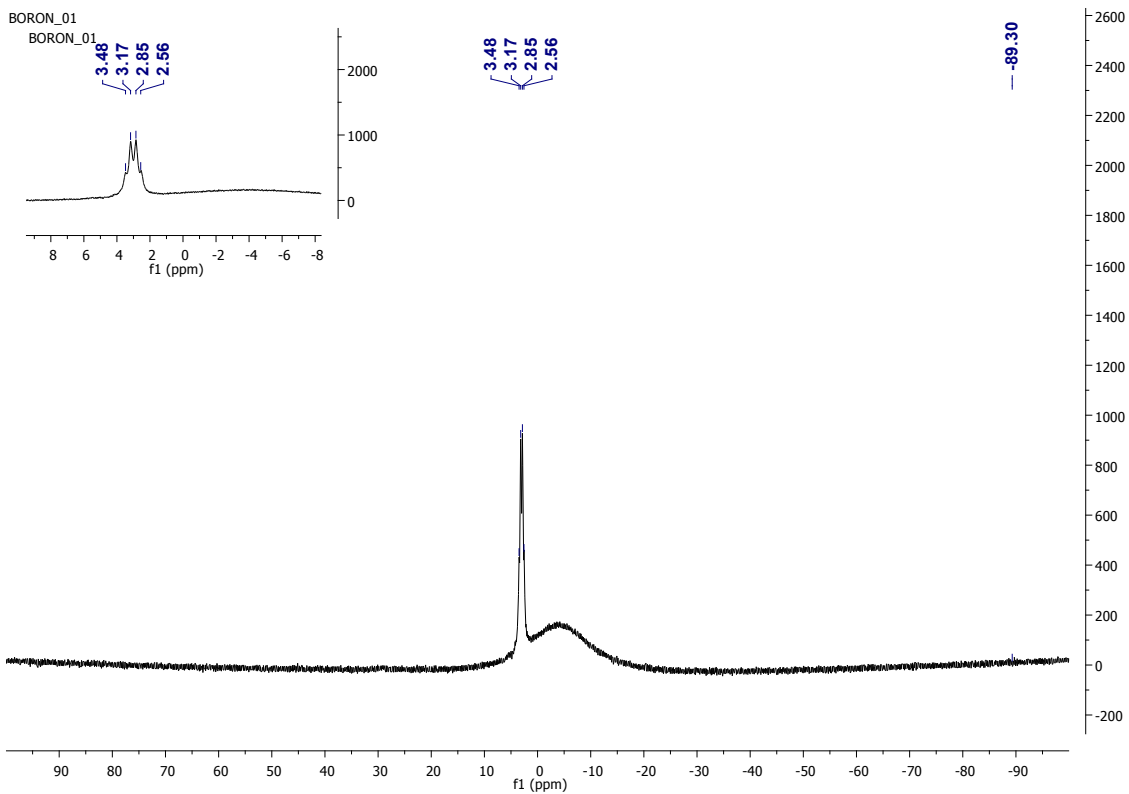

Figure S13.  $^{11}\text{B}$   $\{^1\text{H}\}$  NMR of compound 3-Et ( $\text{CDCl}_3$ , 160 MHz)

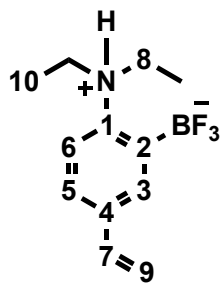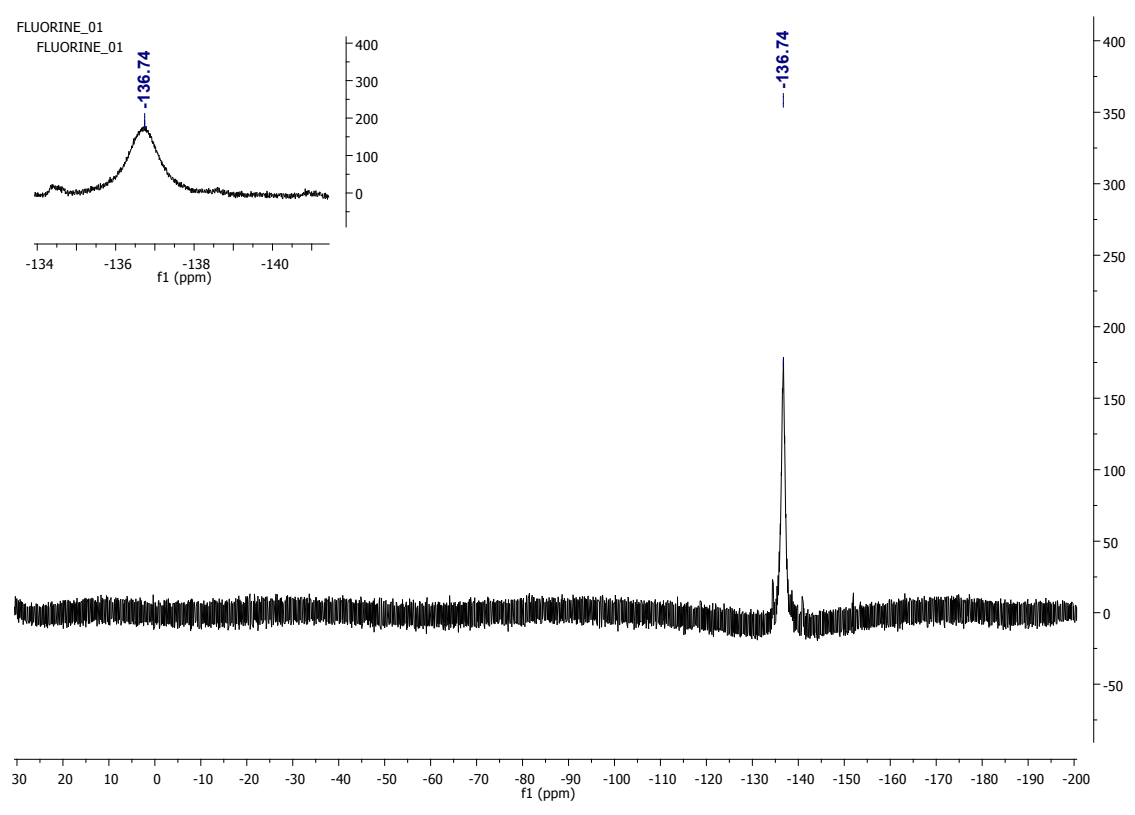

Figure S14. <sup>19</sup>F NMR of 3-Et (CDCl<sub>3</sub>, 470 MHz).

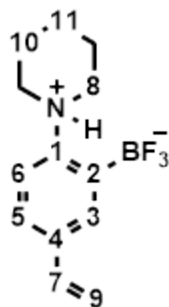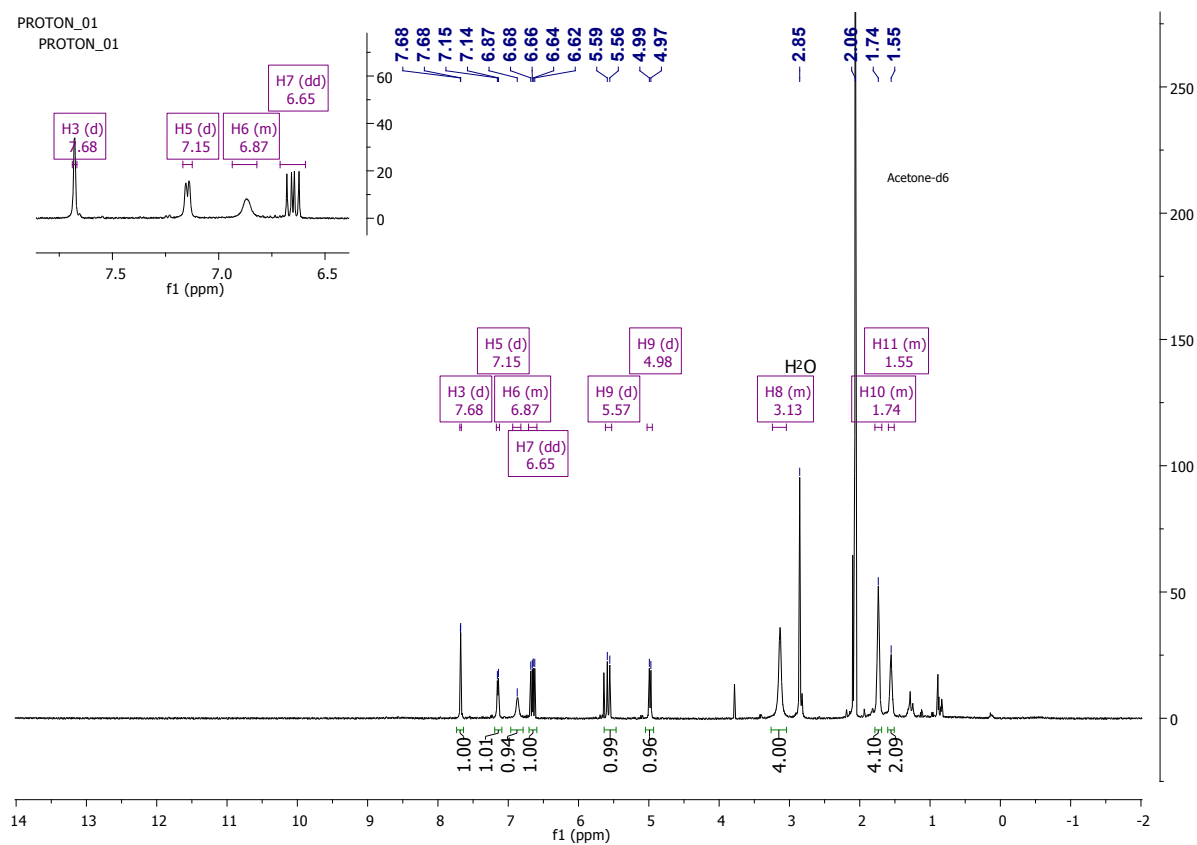

Figure S15.  $^1\text{H}$  NMR of 3-Pip (acetone- $d_6$ , 500 MHz).

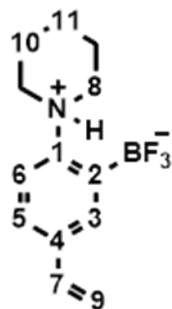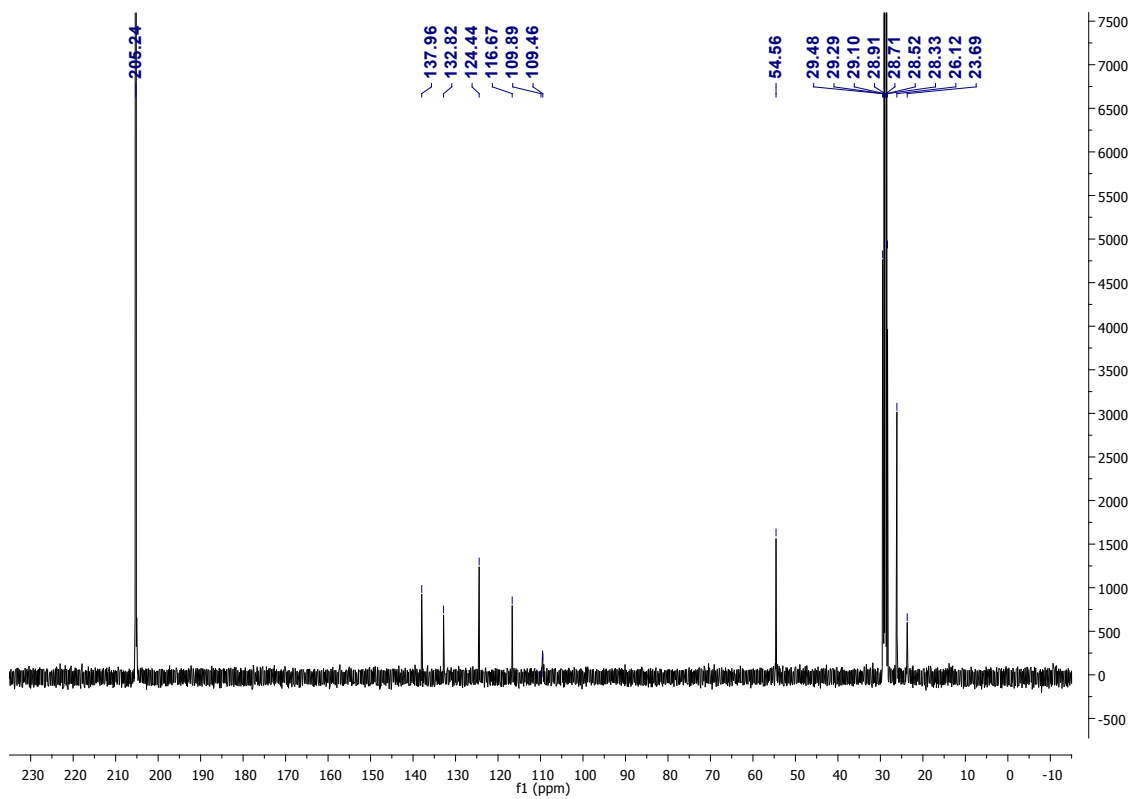

Figure S16.  $^{13}\text{C}$  [ $^1\text{H}$ ] NMR of **3-Pip** (acetone- $d_6$ , 126 MHz).



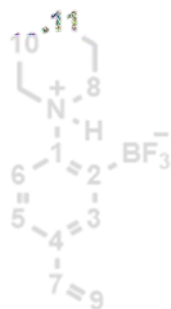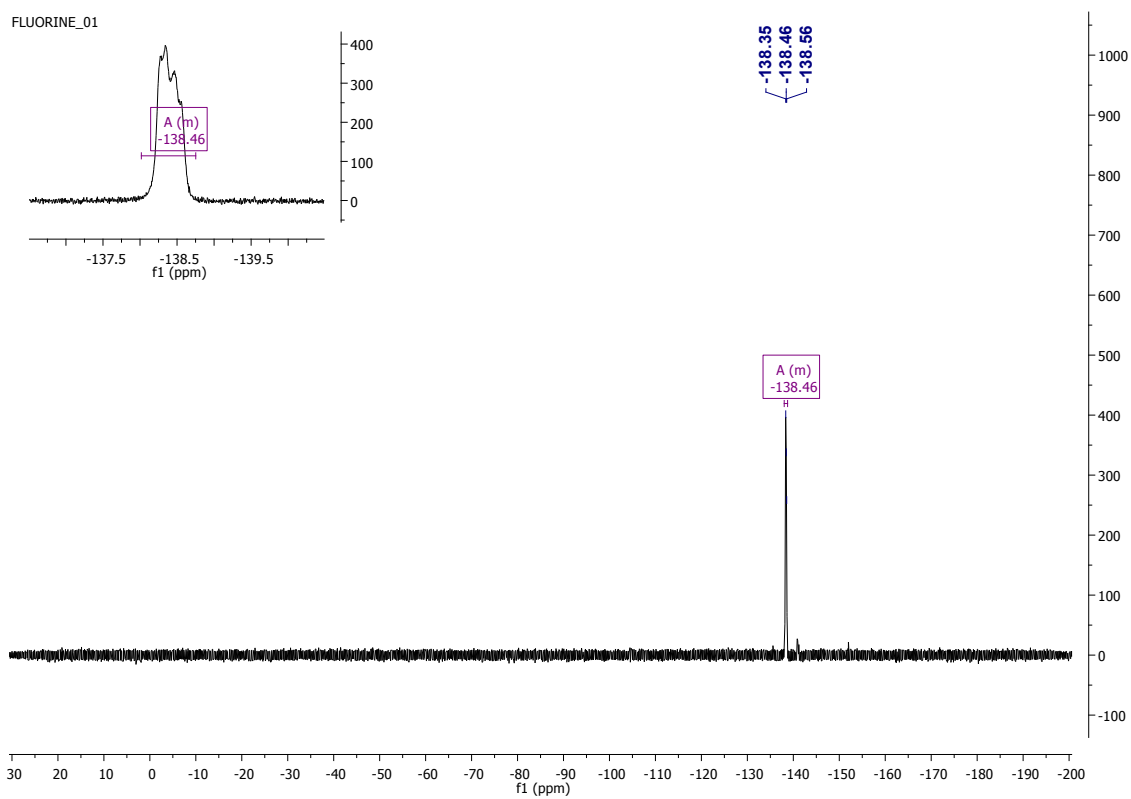

Figure S17. <sup>19</sup>F NMR of 3-Pip (acetone-d<sub>6</sub>, 470 MHz).

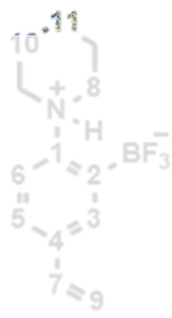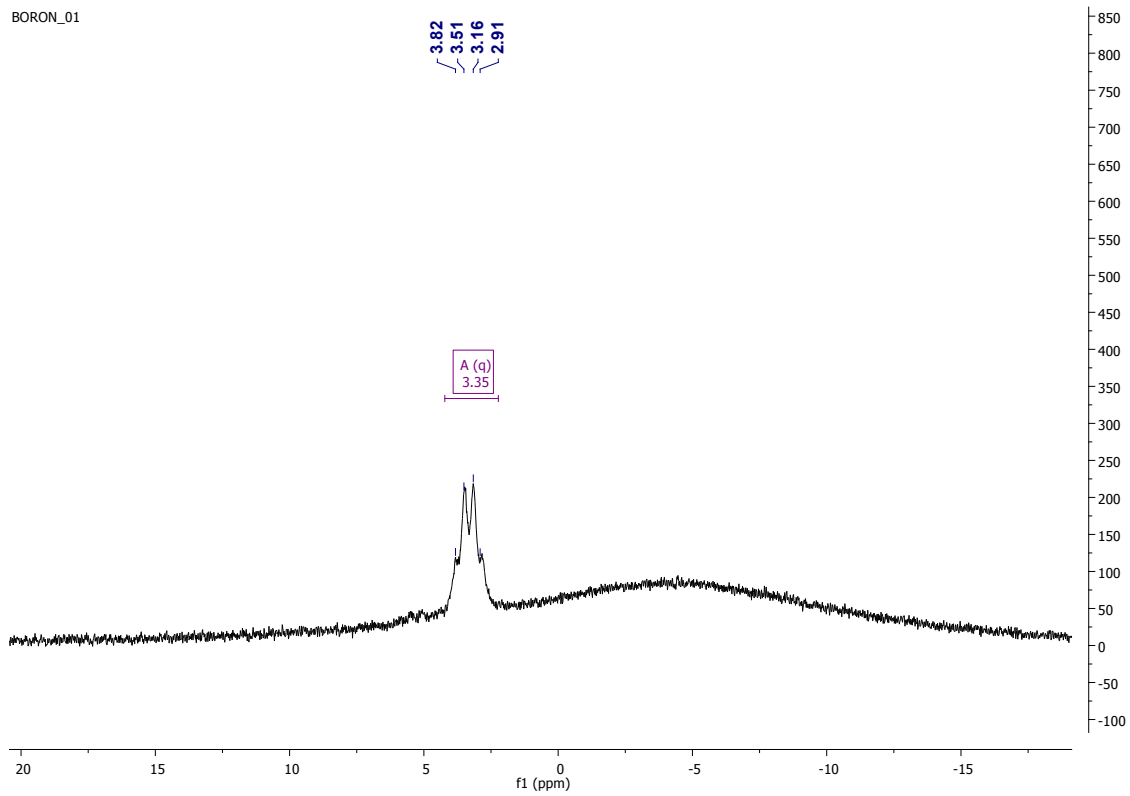

Figure S18. <sup>11</sup>B NMR of 3-Pip (acetone-d<sub>6</sub>, 160 MHz).

## 1.4 Synthesis of polymers P-R.

### Synthesis of P-Me.

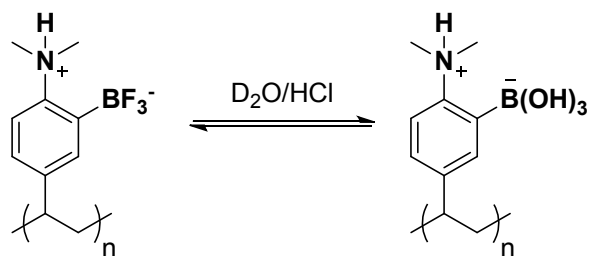

*Scheme S2. In situ hydrolysis of P-Me in  $\text{D}_2\text{O}/\text{HCl}$  NMR solvent.*

**Isolated yield (based on monomer) : 73 %**

**$^1\text{H}$  NMR ( $\text{D}_2\text{O}$ ,  $\text{H}^+$ ) 500 MHz):**  $\delta$  7.47- 6.36 (m, 3H, Ar-H), 3.03 (bs, 6H, N- $\text{CH}_3$ ), 1.69-1.09 (m, 3H,  $\text{CH}_2\text{CH}$ ).

**$^{11}\text{B}$  NMR ( $\text{D}_2\text{O}$ ,  $\text{H}^+$ , 160 MHz):**  $\delta$  0.0 (q,  $J_{\text{B-F}} = 50$  Hz, 1B,  $\text{BF}_3$ ), -1.5 (s, 1B, Ar- $\text{B}(\text{OH})_3^-$ )

**$^{19}\text{F}$  NMR ( $\text{D}_2\text{O}$ ,  $\text{H}^+$ , 470 MHz):**  $\delta$  -129,7 (m, 3F), -150.1 (s, 2F,  $\text{HF}_2^-$ )<sup>2</sup>

(See next section for SEC-GPC datas).

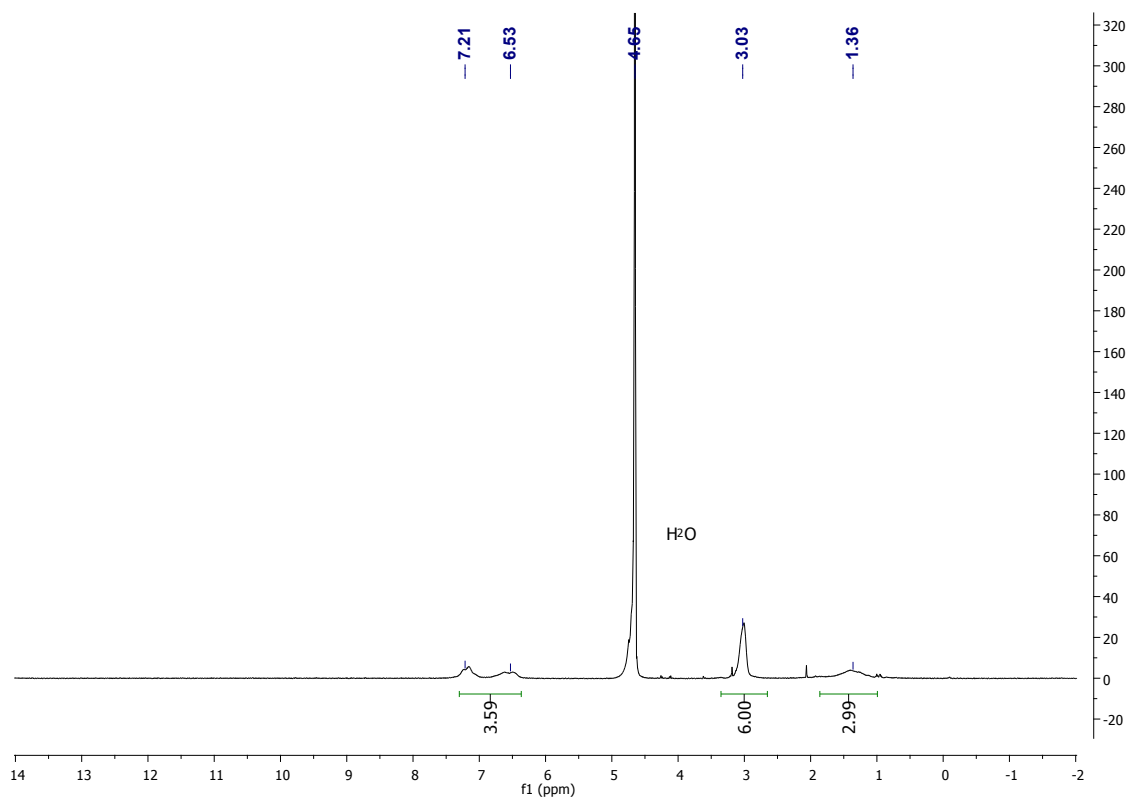

**Figure S19.** <sup>1</sup>H NMR of compound **P-Me** (D<sub>2</sub>O/HCl), 500 MHz).

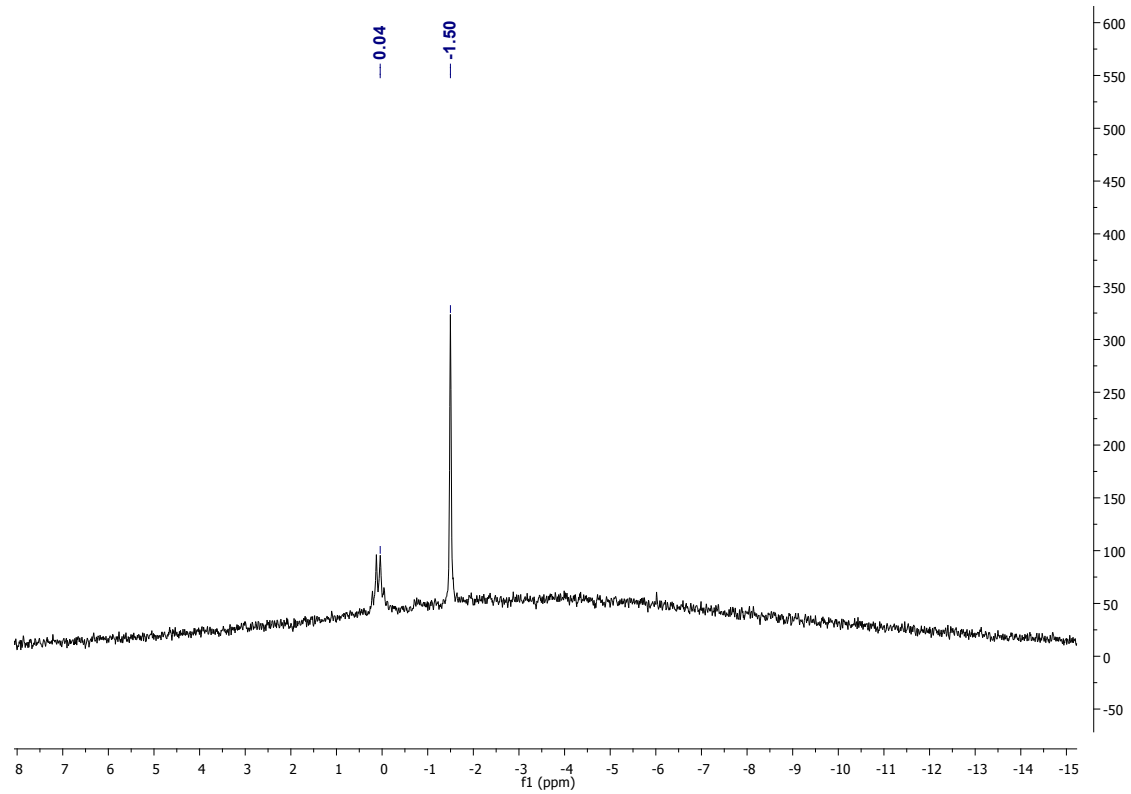

**Figure S20.**  $^{11}\text{B}$  NMR of *P-Me* ( $\text{D}_2\text{O}/\text{HCl}$ , 160 MHz).

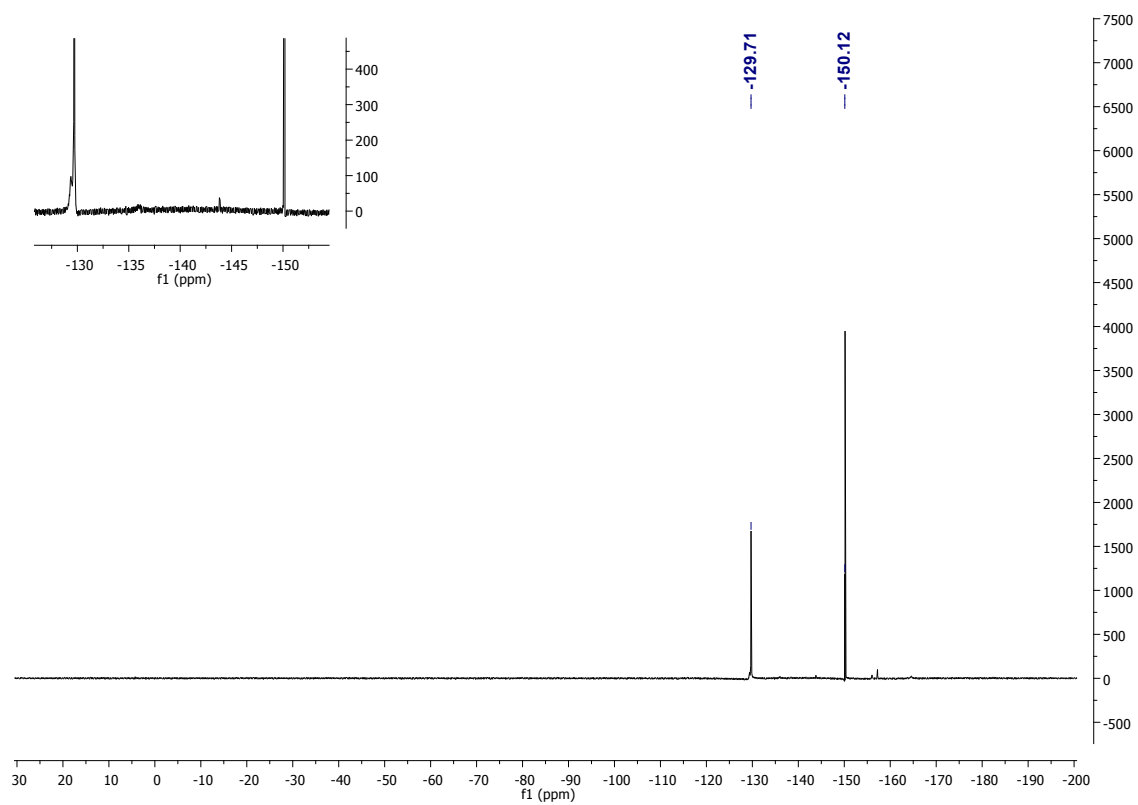

**Figure S21.**  $^{19}\text{F}$  NMR of compound *P-Me* ( $\text{D}_2\text{O}$ ,  $\text{H}^+$ , 470 MHz).

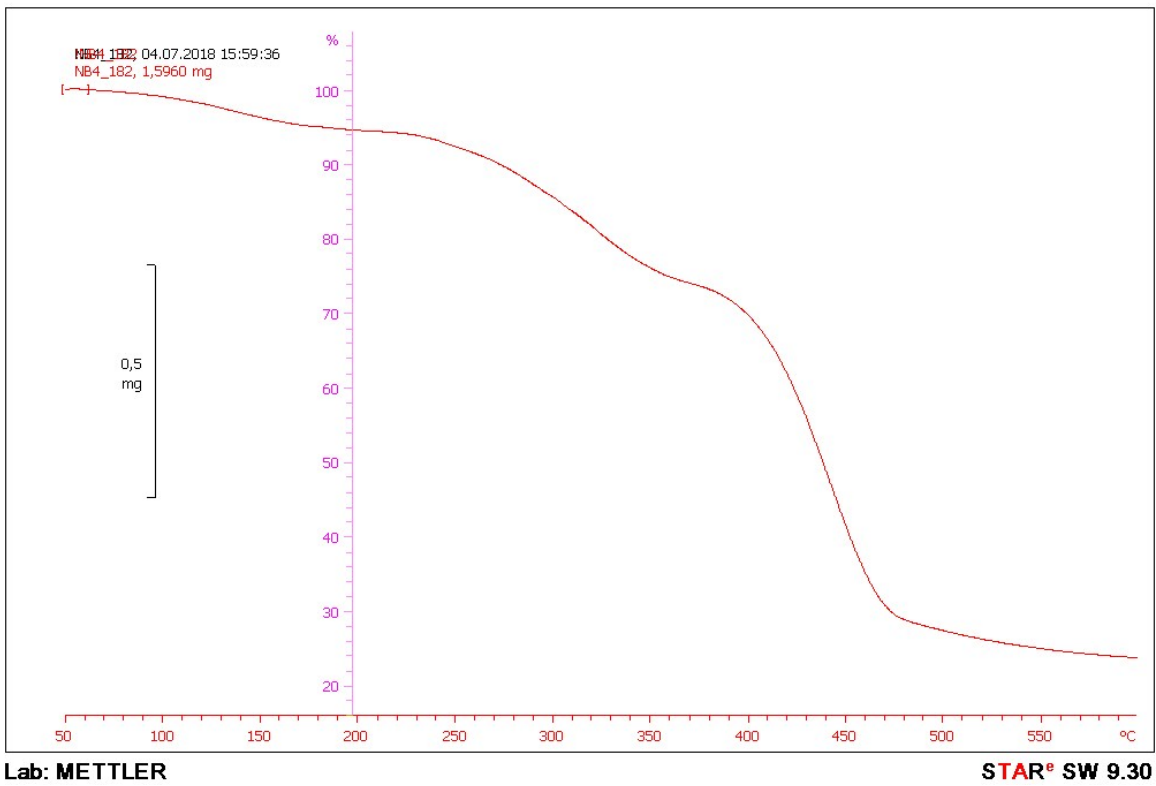

Figure S22. TGA curve of polymer P-Me.

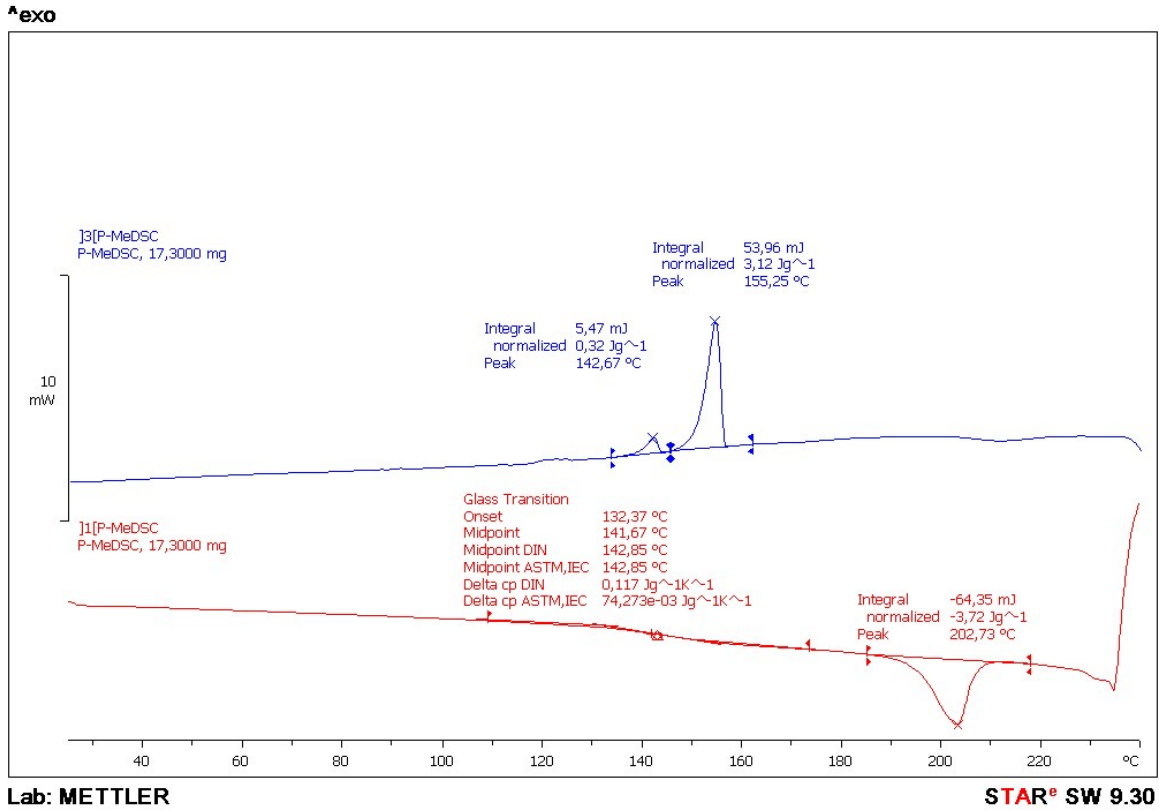

**Figure S23.** DSC heating (red ) and cooling (blue) curves for P-Me.



## Synthesis of P-Et

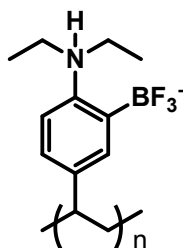

**P-Et**

**Isolated Yield: 72 %**

**<sup>1</sup>H NMR (DMSO-*d*<sub>6</sub>, 500 MHz):** δ 8.54 (bs, 1H, N-H), 7.60- 6.01 (m, 3H, Ar-H), 3.79-3.47 (m, 4H, N-CH<sub>2</sub>-CH<sub>3</sub>, incorporated in solvent peaks), 1.06-0.7 (bs, 6H, CH<sub>3</sub>-CH<sub>2</sub>-N) 2.18-1.25 (Aliphatic chain protons) ppm.

**<sup>11</sup>B NMR (DMSO-*d*<sub>6</sub>, 160 MHz):** δ 1.6 (m, 1B, BF<sub>3</sub>)

**<sup>19</sup>F NMR (DMSO-*d*<sub>6</sub>, 470 MHz):** δ -132.1 (m, 3F), -148.1 (s, 2F, HF<sub>2</sub><sup>-</sup>)<sup>2</sup>

PROTON\_01

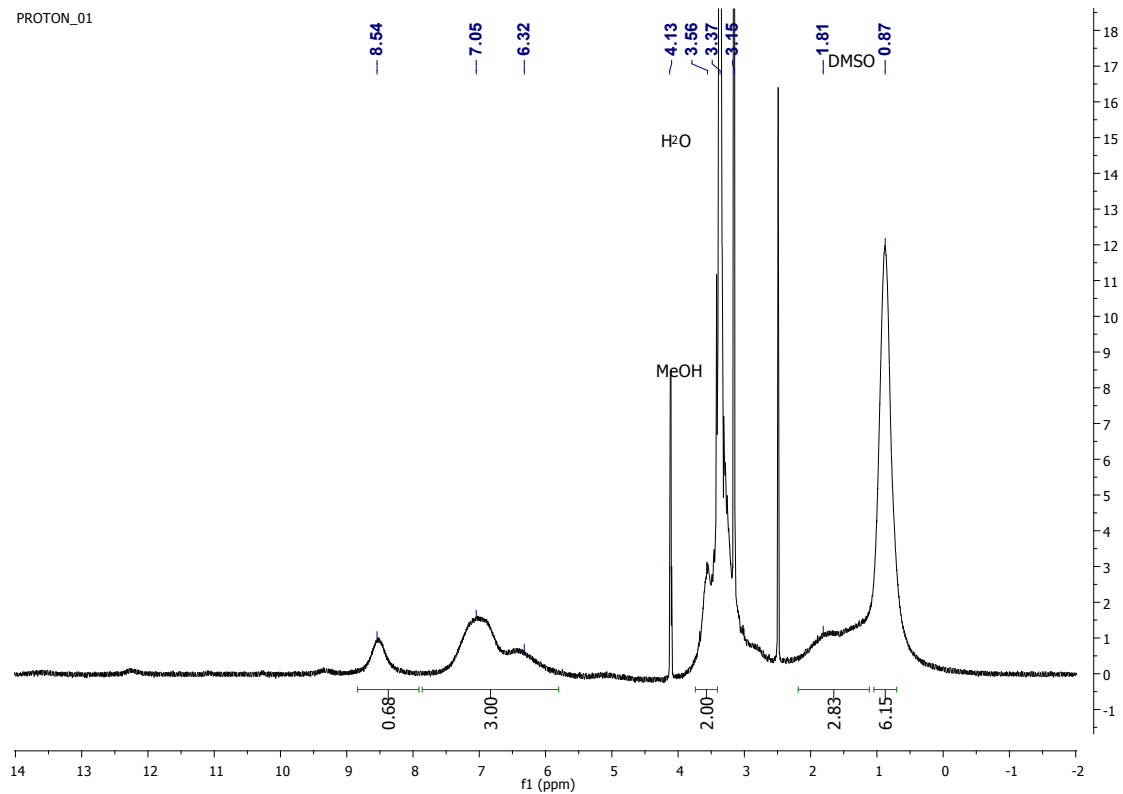

**Figure S24.**  $^1\text{H}$  NMR of compound P-Et ( $\text{DMSO-}d_6$ , 500 MHz).

BORON\_01

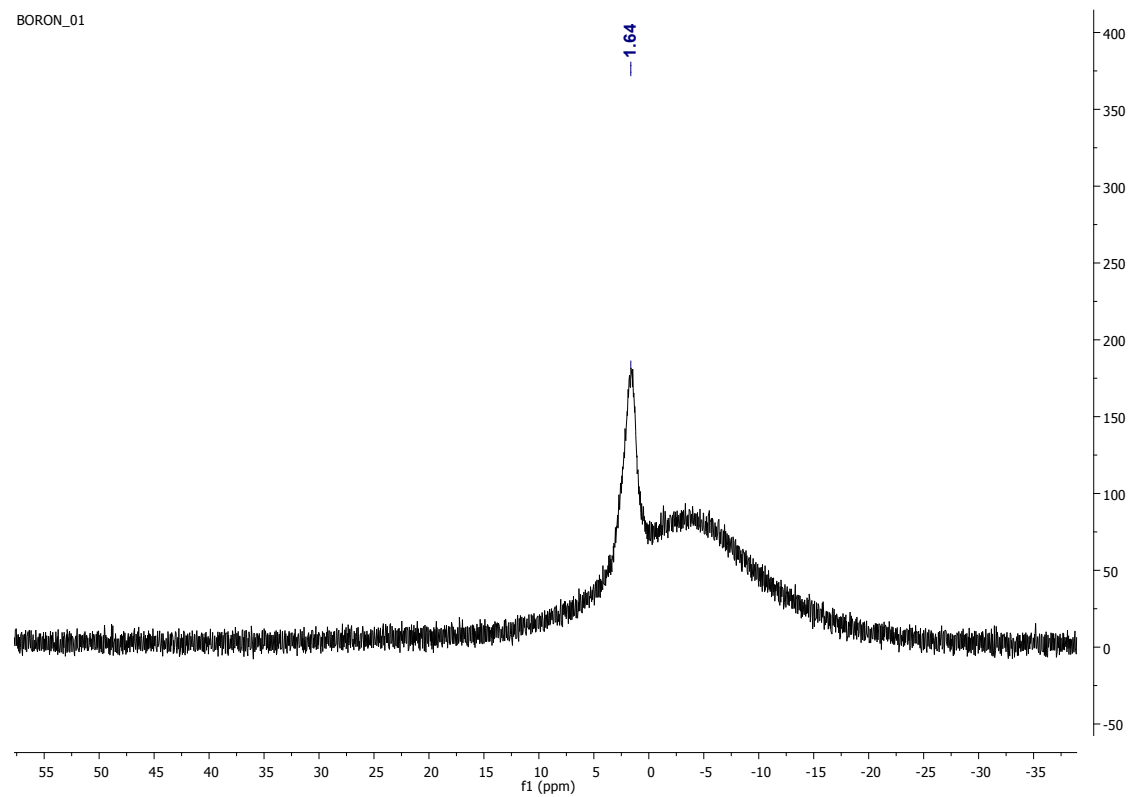

**Figure S25.**  $^{11}\text{B}$  NMR of *P-Et* ( $\text{DMSO-d}_6$ , 160 MHz).

FLUORINE\_01

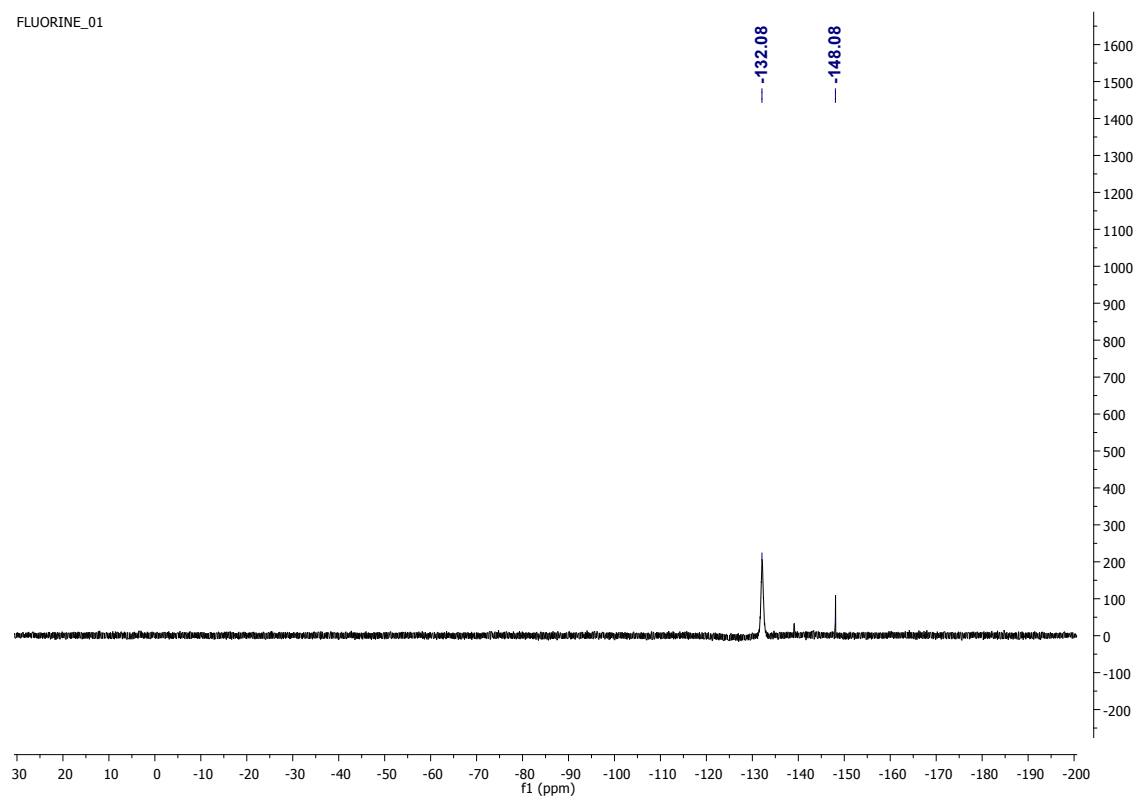

**Figure S26.**  $^{19}\text{F}$  NMR of P-Et (DMSO- $d_6$ , 470 MHz).

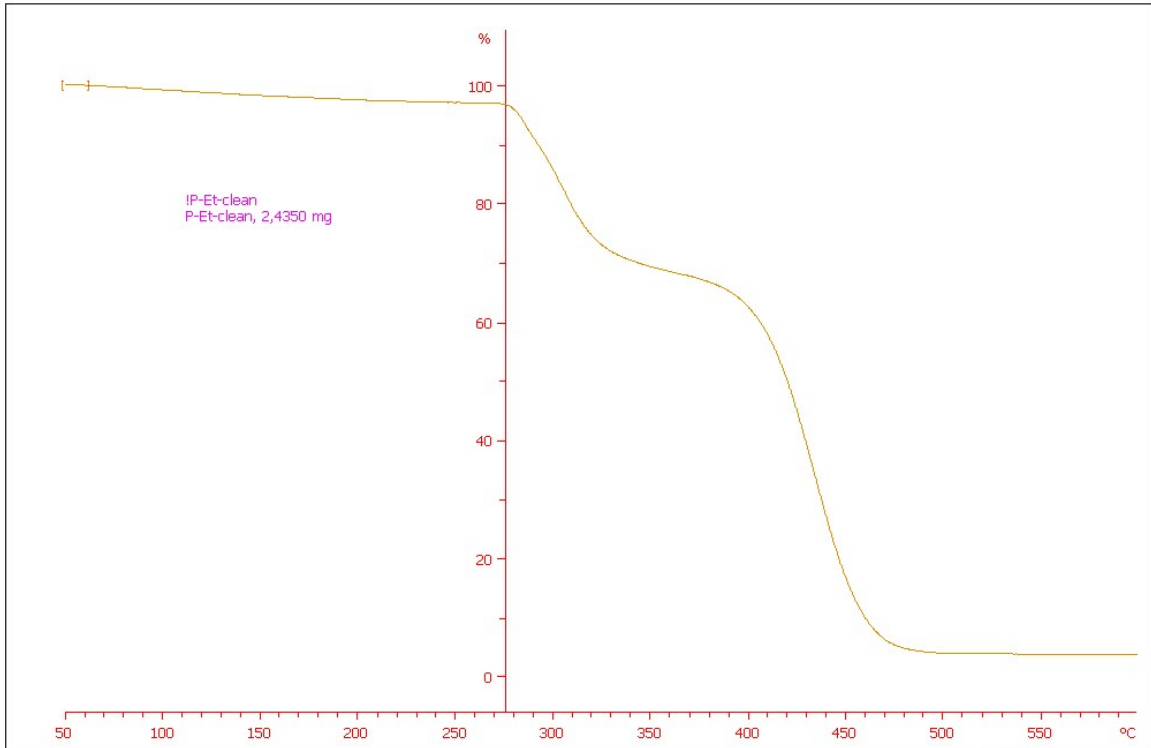

Lab: METTLER

STAR<sup>e</sup> SW 9.30

Figure S27. TGA curve of P-Et.

^exo

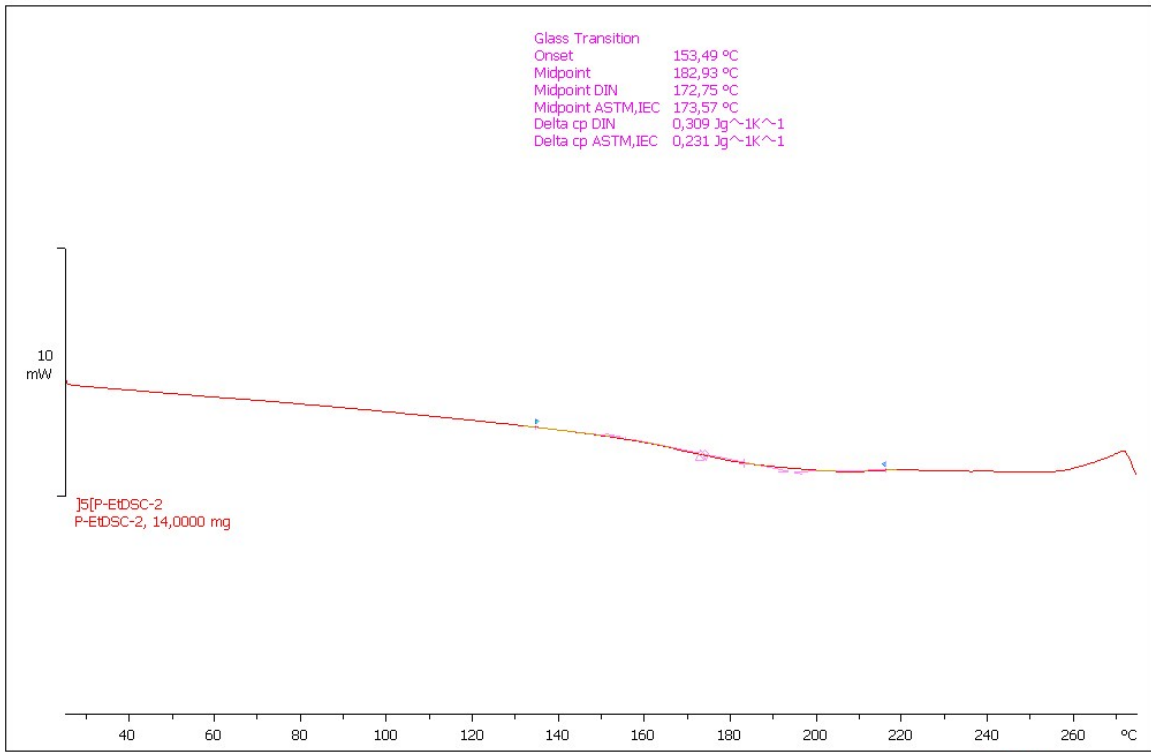

Lab: METTLER

STAR<sup>®</sup> SW 9.30

Figure S28. DSC heating curve of P-Et.

## Synthesis of P-Et\*

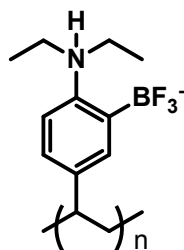

**P-Et**

**Isolated Yield: 70 %**

**<sup>1</sup>H NMR (DMSO-d<sub>6</sub>, 500 MHz):** δ 8.54 (bs, 1H, N-H), 7.60- 6.01 (m, 3H, Ar-H), 3.79-3.47 (m, 4H, N-CH<sub>2</sub>-CH<sub>3</sub>, incorporated in solvent peaks), 1.06-0.7 (bs, 6H, CH<sub>3</sub>-CH<sub>2</sub>-N) 2.18-1.25 (Aliphatic chain protons) 2.02-1.63 (Residual cyclohexanol) ppm.

**<sup>11</sup>B {<sup>1</sup>H} NMR (DMSO-d<sub>6</sub>, 160 MHz):** δ 1.6 (m, 1B, BF<sub>3</sub>) (same as **P-Et**).

**<sup>19</sup>F {<sup>1</sup>H} NMR (DMSO-d<sub>6</sub>, 470 MHz):** δ -132.1 (m, 3F), -148.1 (s, 2F, HF<sub>2</sub><sup>-</sup>)<sup>2</sup> (same as P-Et).

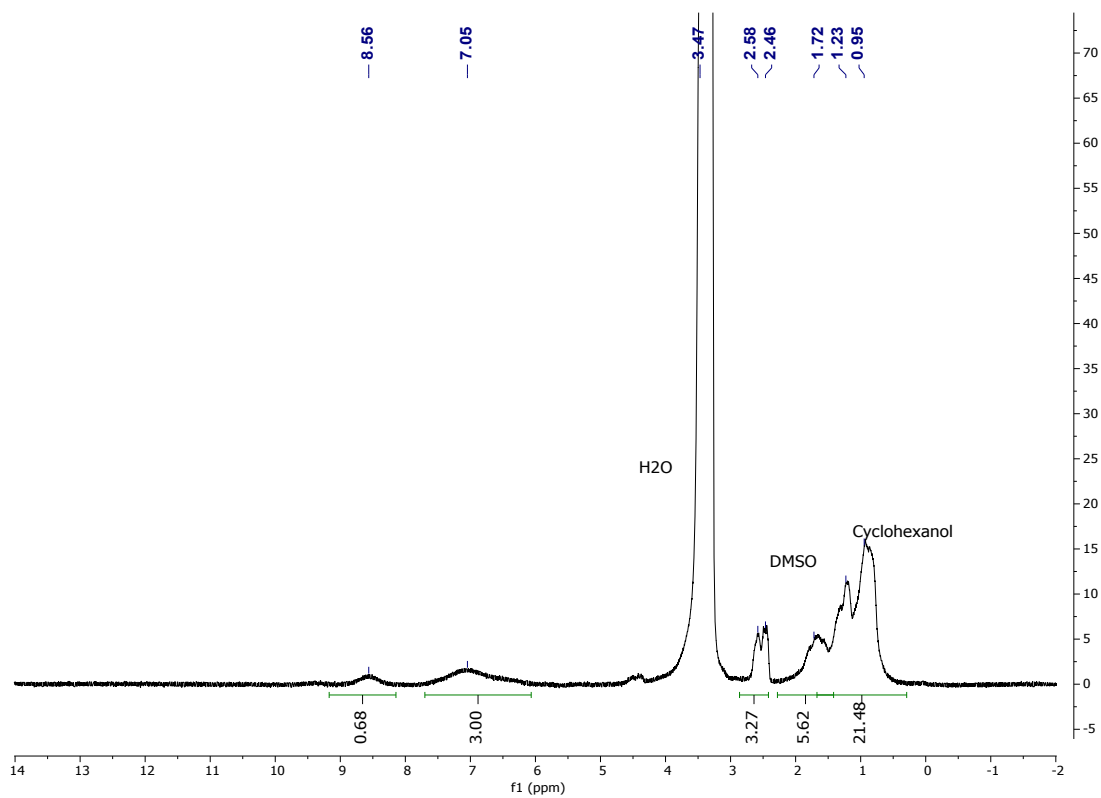

**Figure S29.**  $^1\text{H}$  NMR of compound *P-Et\** in  $\text{DMSO-d}_6$  (500 MHz).



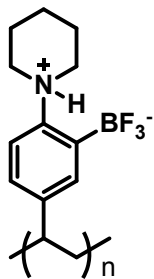

**P-Pip**

**Isolated Yield: 83 %**

**$^1\text{H}$  NMR (DMSO- $d_6$ , 500 MHz):**  $\delta$  8.44 (bs, 1H, N-H), 7.70- 6.01 (m, 3H, Ar-H), c.a 3.6-3.24 (m, 4H, N-CH<sub>2</sub>), 2.02-0.70 (m, 6H, **CH-CH<sub>2</sub>-CH<sub>2</sub>-N**, aliphatic (9H) + residual cyclohexanol)

**$^{11}\text{B}$  { $^1\text{H}$ } NMR (DMSO- $d_6$ , 160 MHz):**  $\delta$  2.0 (m, 1B, BF<sub>3</sub>), 0.6 (m, 1B, BF<sub>3</sub>)

**$^{19}\text{F}$  { $^1\text{H}$ } NMR (DMSO- $d_6$ , 470 MHz):**  $\delta$  -137.6 (m, 3F)

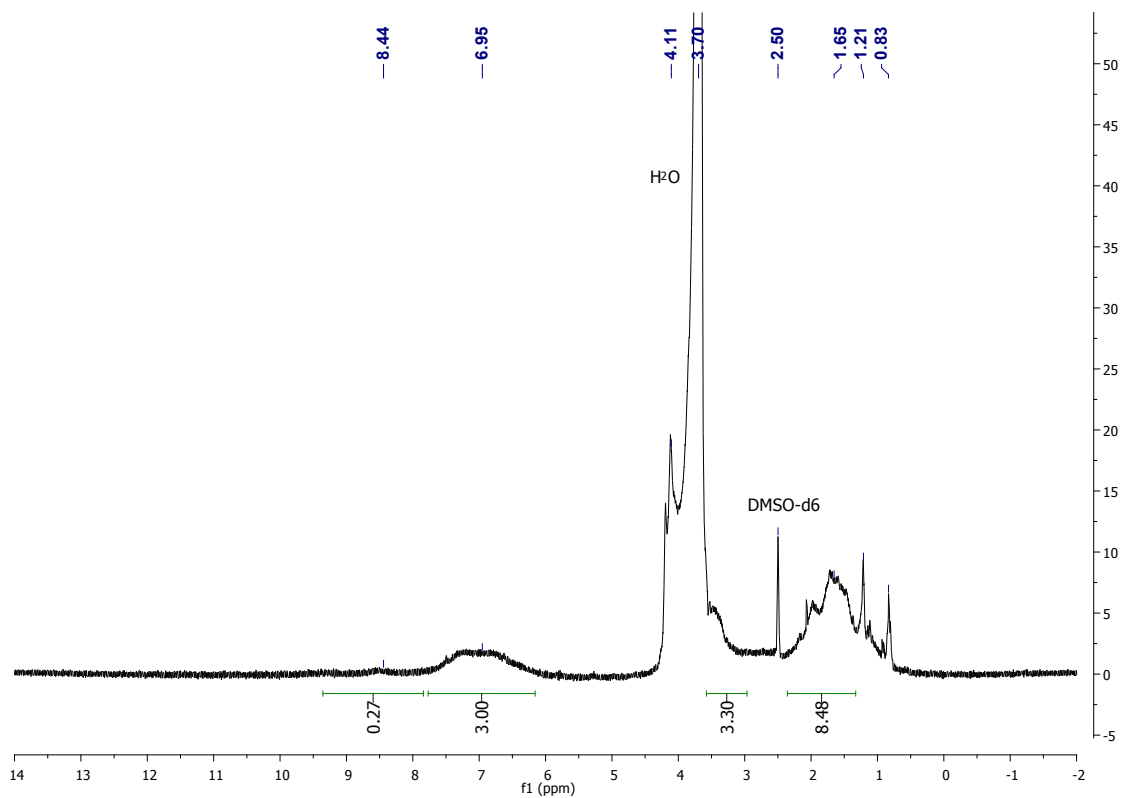

**Figure S30.**  $^1\text{H}$  NMR of **P-Pip** ( $\text{DMSO-d}_6$ , 500 MHz).

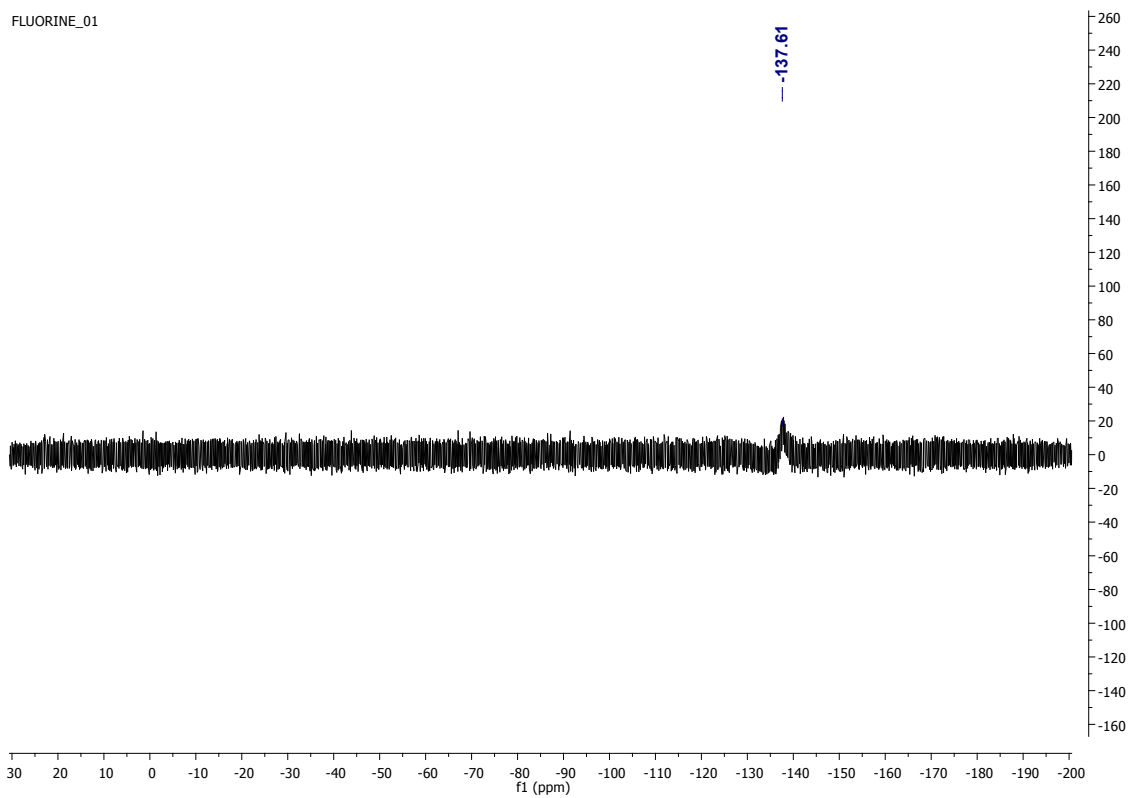

**Figure S31.**  $^{19}\text{F}$  NMR of *P-Pip* ( $\text{DMSO-}d_6$ , 470 MHz).

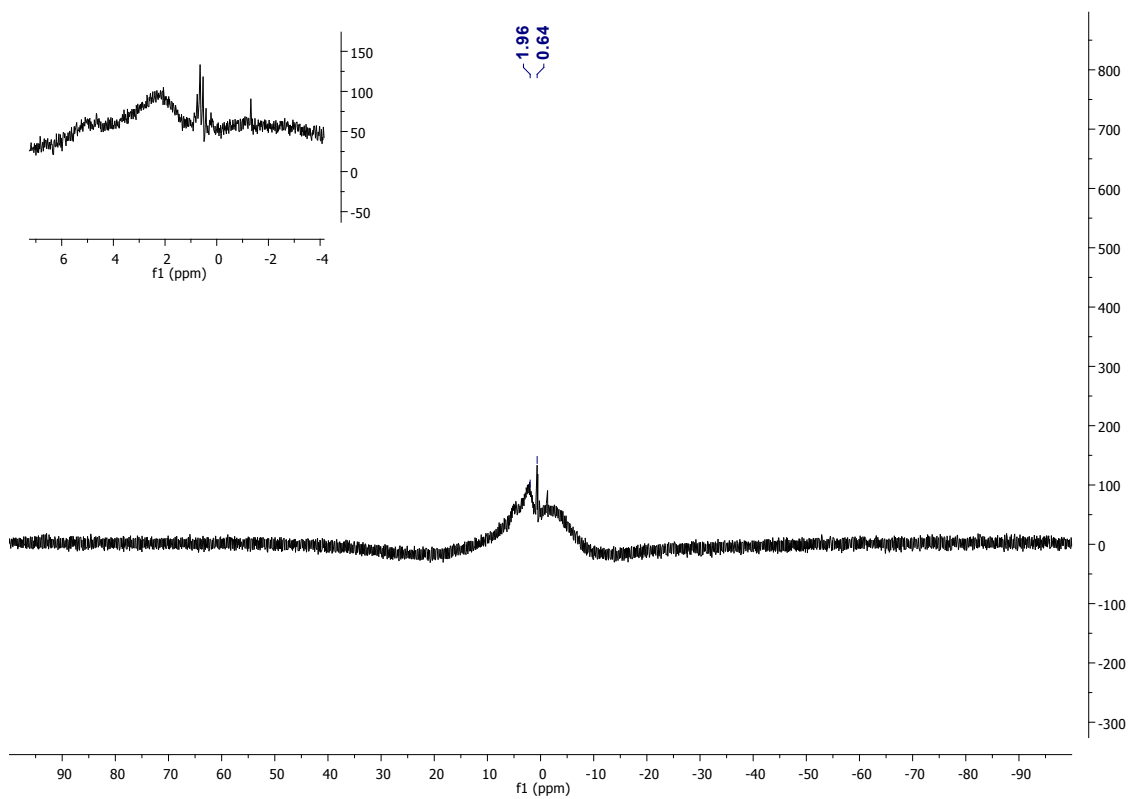

**Figure S32.**  $^{11}\text{B}$  NMR of P-Pip ( $\text{DMSO-}d_6$ , 160 MHz).

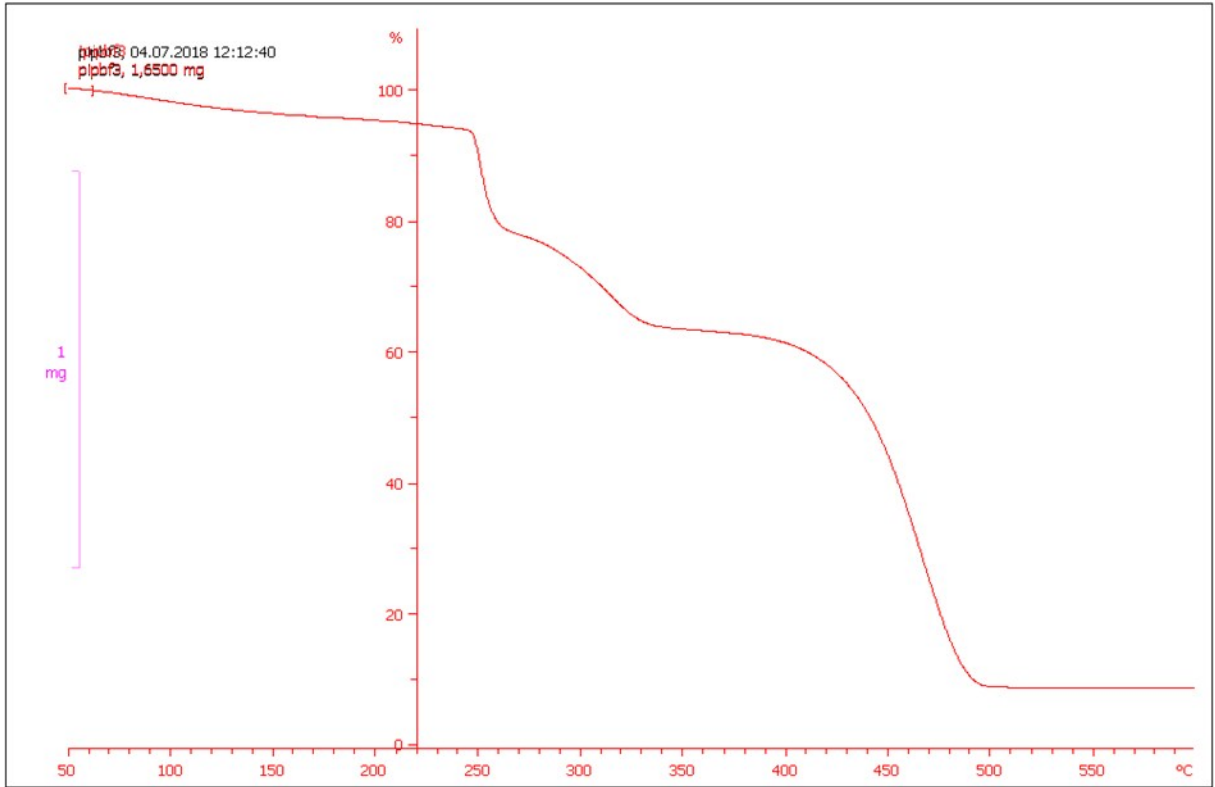

Lab: METTLER

STAR<sup>e</sup> SW 9.30

Figure S33. TGA curve of P-Pip.

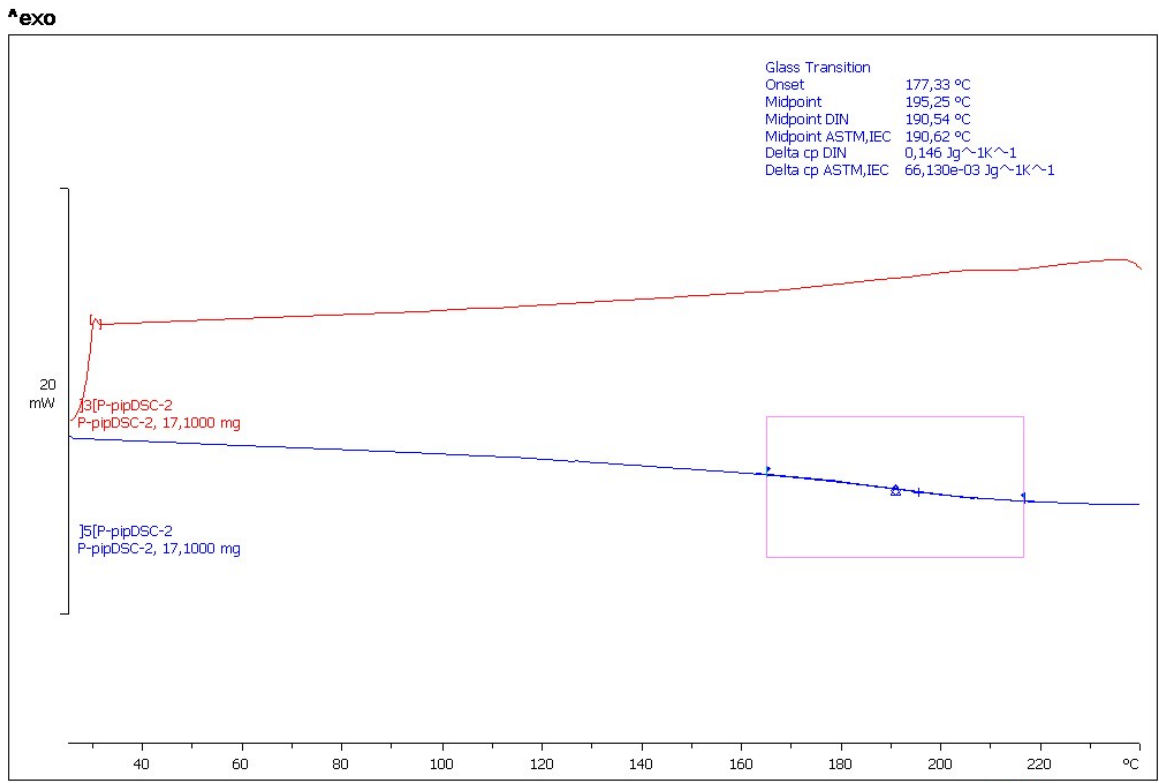

Lab: METTLER

STAR<sup>®</sup> SW 9.30

Figure S34. DSC heating (blue) and cooling (red) curves of P-Pip.

## 1.5 General procedure for the metal-free catalytic borylation of heteroarenes.

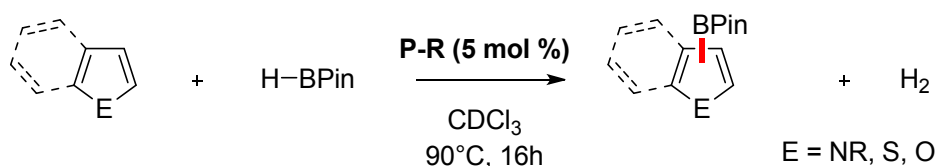

*Scheme S3. General borylation conditions.*

In a nitrogen-filled glovebox, HBpin and the heteroaromatic substrate were added to a J-Young NMR tube in the specified quantities. 0.023 mmol (5 mg for **P-Me**, 5.6 mg for **P-Et** and 5.9 mg for **P-pip**) of the pre-catalyst **P-R** were added to the J-young tube along with 400  $\mu$ L of CDCl<sub>3</sub> if specified. The tube was sealed and put to heat for a timed duration of 16h or 32h (see specified details). The tube was re-entered in the glovebox and filled with CDCl<sub>3</sub> to record the <sup>1</sup>H NMR conversion. The conversions were monitored based on the integration of new peaks on the spectrum that are attributed to the previously reported borylated substrates<sup>3-5</sup>.

### Borylation of 1-methylpyrrole

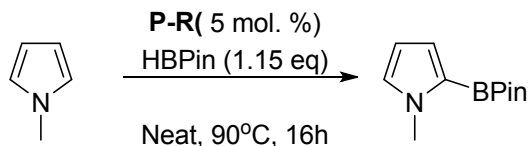

*Scheme 54. Borylation of 1-methylpyrrole.*

The general procedure was followed. 1-methylpyrrole (39.4  $\mu\text{L}$ , 99.1 mg, 1.22 mmol) was reacted with HBPin (65.4  $\mu\text{L}$ , 156 mg, 1.22 mmol). Conversion was measured by  $^1\text{H}$  NMR, based on the apparition of the borylated compound<sup>3</sup>.

1-methyl-2-(4,4,5,5-tetramethyl-1,3,2-dioxaborolan-2-yl)pyrrole (**3a**):  $^1\text{H}$  NMR (400 MHz,  $\text{CDCl}_3$ )  $\delta$  6.81 (m, 2H), 6.15 (m, 1H), 3.84 (s, 3H), 1.31 (s, 12H).  $^{13}\text{C}\{^1\text{H}\}$  NMR (101 MHz,  $\text{CDCl}_3$ ):  $\delta$  128.3, 122.0, 108.6, 83.2, 36.7, 25.0.  $^{11}\text{B}\{^1\text{H}\}$  NMR (160 MHz,  $\text{CDCl}_3$ ) :  $\delta$  28.1.

### Borylation of 1-benzylpyrrole

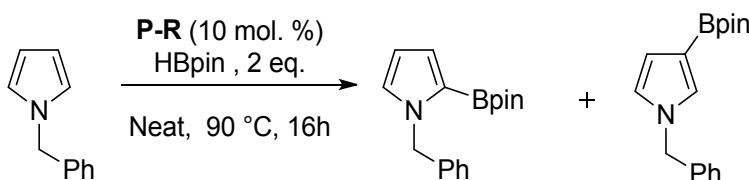

*Scheme 55. Borylation of 1-benzylpyrrole.*

Quantity of 1-benzylpyrrole: 35.5  $\mu\text{L}$

Quantity of HBpin : 76.75  $\mu\text{L}$

1-benzyl-2-(4,4,5,5-tetramethyl-1,3,2-dioxaborolan-2-yl)pyrrole:  $^1\text{H}$  NMR (400 MHz,  $\text{CDCl}_3$ )  $\delta$  7.30 – 7.17 (m, 3H), 7.12 – 7.06 (m, 2H), 6.89 (dd,  $J$  = 2.4, 1.6 Hz, 1H), 6.86 (dt,  $J$  = 3.6, 1.9 Hz, 1H), 6.23 – 6.19 (m, 1H), 5.39 (s, 2H), 1.24 – 1.21 (m, 13H).



1-benzyl-3-(4,4,5,5-tetramethyl-1,3,2-dioxaborolan-2-yl)pyrrole:  $^1\text{H}$  NMR (400 MHz,  $\text{CDCl}_3$ )  $\delta$  7.36 – 7.26 (m, 3H), 7.17 – 7.12 (m, 3H), 6.73 – 6.68 (m, 1H), 6.51 (dd,  $J = 2.6, 1.7$  Hz, 1H), 5.06 (s, 2H), 1.31 (s, 12H).

Mixture:  $^{13}\text{C}\{^1\text{H}\}$  NMR (126 MHz,  $\text{CDCl}_3$ )  $\delta$  139.8, 137.7, 130.4, 128.9, 128.5, 127.9, 127.7, 127.5, 127.2, 127.0, 122.4, 122.3, 114.6, 109.1, 83.3, 82.9, 53.5, 52.9, 25.0, 24.8.  $^{11}\text{B}\{^1\text{H}\}$  NMR (160 MHz,  $\text{CDCl}_3$ )  $\delta$  27.8.

### Borylation of 1-methylindole

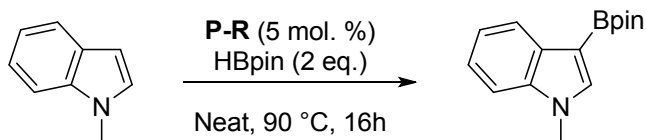

*Scheme S6. Borylation of 1-methylindole.*

Quantity of 1-methylindole: 57.4  $\mu\text{L}$

Quantity of HBpin : 153.5  $\mu\text{L}$

$^1\text{H}$  NMR (400 MHz,  $\text{CDCl}_3$ )  $\delta$  8.04 (ddd,  $J = 7.7, 1.4, 0.8$  Hz, 1H), 7.52 (s, 1H), 7.35 – 7.31 (m, 1H), 7.25 – 7.15 (m, 2H), 3.80 (s, 3H), 1.37 (s, 12H);  $^{13}\text{C}\{^1\text{H}\}$  NMR (101 MHz,  $\text{CDCl}_3$ )  $\delta$  138.6, 138.0, 132.6, 122.8, 121.9, 120.3, 109.3, 82.9, 33.1, 25.0.  $^{11}\text{B}\{^1\text{H}\}$  NMR (160 MHz,  $\text{CDCl}_3$ )  $\delta$  29.7.

### Borylation of 3,4-ethylenedioxythiophene

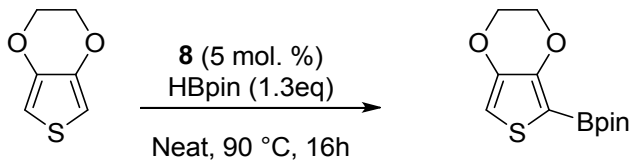

*Scheme S7. Borylation of 3,4-ethylenedioxythiophene.*

Quantity of 3,4-ethylenedioxythiophene: 49.6  $\mu\text{L}$

Quantity of HBpin : 76.75  $\mu\text{L}$

$^1\text{H}$  NMR (500 MHz,  $\text{CDCl}_3$ )  $\delta$  6.63 (s, 1H), 4.31 – 4.28 (m, 2H), 4.19 – 4.17 (m, 2H), 1.34 (s, 12H).  $^{13}\text{C}\{^1\text{H}\}$  NMR (126 MHz,  $\text{CDCl}_3$ )  $\delta$  149.2, 142.5, 107.6, 84.0, 65.2, 64.4, 24.9;  $^{11}\text{B}\{^1\text{H}\}$  NMR (160 MHz,  $\text{CDCl}_3$ )  $\delta$  28.2.

### Borylation of 2-silyloxyfuran

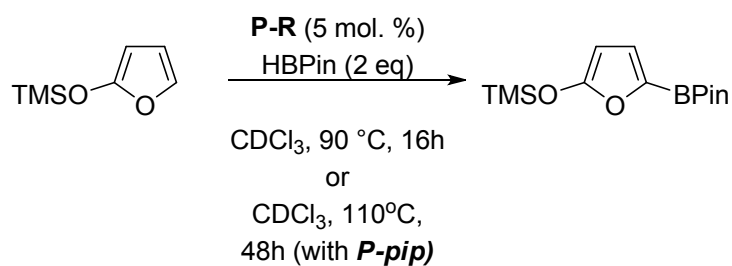

**Scheme S8.** Borylation of 2-silyloxyfuran.

Quantity of 2-silyloxyfuran : 76.9  $\mu\text{L}$

Quantity of HBpin : 153.5  $\mu\text{L}$

$^1\text{H}$  NMR (400 MHz,  $\text{CDCl}_3$ )  $\delta$  6.96 (d,  $J = 3.3$ , 1H), 5.18 (d,  $J = 3.3$ , 1H), 1.31 (s, 12H), 0.30 (s, 9H).  $^{13}\text{C}\{^1\text{H}\}$  NMR (101 MHz,  $\text{CDCl}_3$ )  $\delta$  126.4, 110.2, 85.5, 83.9, 24.9, -0.1.  $^{11}\text{B}\{^1\text{H}\}$  NMR (160 MHz,  $\text{CDCl}_3$ )  $\delta$  26.7.

## Borylation of 2-methylfuran

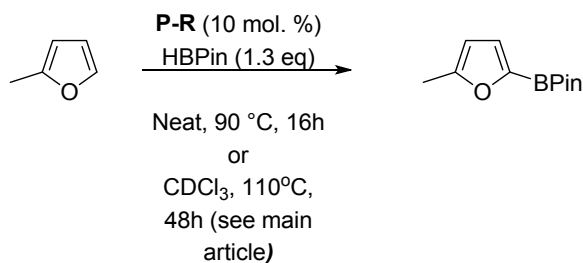

*Scheme S9. Borylation of 2-methylfuran.*

Quantity of 2-methylfuran : 20.8  $\mu$ L

Quantity of HBpin : 43.4  $\mu$ L

<sup>1</sup>H NMR (400 MHz, CDCl<sub>3</sub>)  $\delta$  6.99 (d, *J* = 3.3 Hz, 1H), 6.03 (dq, *J* = 3.3, 0.9 Hz, 1H), 2.36 (s, 3H), 1.34 (s, 1H). <sup>13</sup>C{<sup>1</sup>H} NMR (101 MHz, CDCl<sub>3</sub>)  $\delta$  157.9, 125.0, 107.0, 84.2, 24.9, -14.1. <sup>11</sup>B{<sup>1</sup>H} NMR (160 MHz, CDCl<sub>3</sub>)  $\delta$  27.1.

## Borylation of 1-(triisopropylsilyl)pyrrole

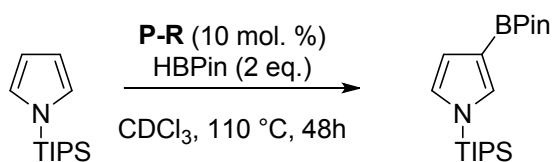

*Scheme S10. Borylation of 1-(triisopropylsilyl)pyrrole.*

Quantity of 1-(triisopropylsilyl)pyrrole : 56.9  $\mu$ L

Quantity of HBpin : 76.8  $\mu$ L

<sup>1</sup>H NMR (400 MHz, CDCl<sub>3</sub>)  $\delta$  7.23 (br. s, 1H), 6.81 (m, 1H), 6.62 (m, 1H), 1.46 (sept, *J* = 7.3 Hz, 3H), 1.32 (s, 12H), 1.09 (d, *J* = 7.3 Hz, 18H). <sup>13</sup>C{<sup>1</sup>H} NMR  $\delta$  (126 MHz, CDCl<sub>3</sub>)  $\delta$  133.8, 125.1, 115.7, 82.9, 25.0, 18.0, 11.8. <sup>11</sup>B{<sup>1</sup>H} NMR (160 MHz, CDCl<sub>3</sub>)  $\delta$  30.0.

### Borylation of 6-chloro-1-methylindole

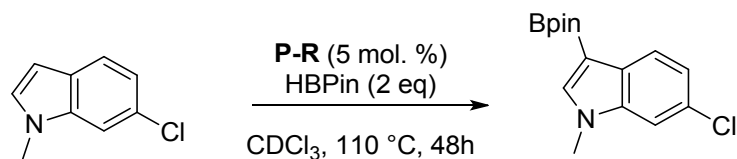

*Scheme S11. Borylation of 6-chloro-1-methylindole.*

Quantity of 6-chloro-1-methylindole: 76.19 mg

Quantity of HBPin: 153.5  $\mu$ L

Apparition of the borylated product is conform with previous reports<sup>4</sup>:

<sup>1</sup>H NMR (500 MHz, CDCl<sub>3</sub>)  $\delta$  8.18 (dd, J = 1.9, 0.5 Hz, 1H), 7.50 (s, 1H), 7.32 (dd, J = 8.6, 2.0 Hz, 1H), 7.15 (dd, J = 8.6, 0.6 Hz, 1H), 3.74 (s, 3H), 1.39 (s, 12H). <sup>13</sup>C{<sup>1</sup>H} NMR (126 MHz, CDCl<sub>3</sub>)  $\delta$  139.37, 136.52, 134.22, 125.03, 124.61, 113.89, 110.72, 82.96, 33.14, 24.94. <sup>11</sup>B{<sup>1</sup>H} NMR (160 MHz, CDCl<sub>3</sub>)  $\delta$  29.88.

### Borylation of 6-fluoro-1-methylindole

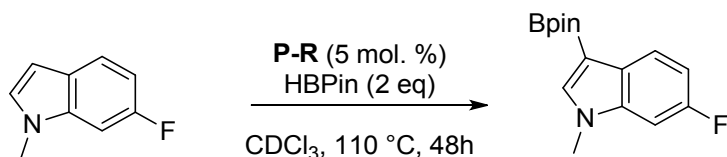

*Scheme S12. Borylation of 6-fluoro-1-methylindole.*

Quantity of 6-chloro-1-methylindole: 68.62 mg

Quantity of HBPin: 153.5  $\mu$ L

Apparition of the borylated product is conform with previous reports<sup>4</sup>:

<sup>1</sup>H NMR (500 MHz, CDCl<sub>3</sub>)  $\delta$  7.97 (dd, J = 8.6, 5.5 Hz, 1H), 7.51 (s, 1H), 7.06 – 6.93 (m, 2H), 3.75 (s, 3H), 1.39 (s, 12H). <sup>13</sup>C{<sup>1</sup>H} NMR (126 MHz, CDCl<sub>3</sub>)  $\delta$  160.84, 158.95, 138.83, 138.80, 137.90, 137.80, 128.77, 123.45, 123.37, 108.83, 108.64, 95.80, 95.60, 82.86, 33.04, 24.93. <sup>11</sup>B{<sup>1</sup>H} NMR (160 MHz, CDCl<sub>3</sub>)  $\delta$  30.21. <sup>19</sup>F NMR (470 MHz, CDCl<sub>3</sub>)  $\delta$  -120.93

## 1.6 Crystallographic details

**Table S1.** Crystal data and structure refinements for compounds **3-Et** and **3-Me**.

| Compound                          | <b>3-Et</b>                                                                              | <b>3-Me</b>                                                                            |
|-----------------------------------|------------------------------------------------------------------------------------------|----------------------------------------------------------------------------------------|
| Empirical formula                 | C <sub>12</sub> H <sub>17</sub> BF <sub>3</sub> N                                        | 4 (C <sub>10</sub> H <sub>13</sub> BF <sub>3</sub> N)                                  |
| Formula weight                    | 243.08                                                                                   | 860.09                                                                                 |
| Temperature                       | 150 K                                                                                    | 150K                                                                                   |
| Wavelength                        | 0.71073 Å                                                                                | 0.71073 Å                                                                              |
| Crystal system                    | Monoclinic                                                                               | Monoclinic                                                                             |
| Space group                       | P 21                                                                                     | P1 21/C1                                                                               |
| Unit cell dimensions              | a=8.1685 (7) Å<br>b=14.6515 (13) Å<br>c=10.9025 (10) Å<br>α= γ = 90°.<br>β= 108.176(10)° | a=13.504 (3) Å<br>b=10.4434 (19) Å<br>c=7.9038 (15) Å<br>α= γ = 90°.<br>β= 104.354(3)° |
| Volume                            | 1239.71(19) Å <sup>3</sup>                                                               | 1079.9(3) Å <sup>3</sup>                                                               |
| Z                                 | 4                                                                                        | 1                                                                                      |
| Density (calculated)              | 1.302 Mg/m <sup>3</sup>                                                                  | 1.323 Mg/m <sup>3</sup>                                                                |
| Absorption coefficient            | 0.106 mm <sup>-1</sup>                                                                   | 0.113                                                                                  |
| F(000)                            | 512.0                                                                                    | 448.0                                                                                  |
| Crystal size                      | 0.30 x 0.26 x 0.15 mm <sup>3</sup>                                                       | 0.26 x 0.5 x 0.26mm <sup>3</sup>                                                       |
| Reflections collected             | 17578                                                                                    | 15534                                                                                  |
| Ind. reflections                  | 7013<br>[R(int) = 0.0252]                                                                | 15071<br>[R(int) = 0.0368]                                                             |
| Refinement method                 | Full-matrix least-squares on F <sup>2</sup>                                              | Full-matrix least-squares on F <sup>2</sup>                                            |
| Goodness-of-fit on F <sup>2</sup> | 1.0460                                                                                   | 1.0560                                                                                 |
| Final R indices [I>2σ(I)]         | R1 = 0.0542                                                                              | R1 = 0.0446                                                                            |
| R indices (all data)              | R1 = 0.0664, wR2 = 0.1480                                                                | R1 = 0.0757 , wR2 = 0.1288                                                             |
| Largest diff. peak and hole       | 0.6 and -0.2 e.Å <sup>-3</sup>                                                           | 0.3 and -0.3 e.Å <sup>-3</sup>                                                         |

Structure of compound **3-Me**

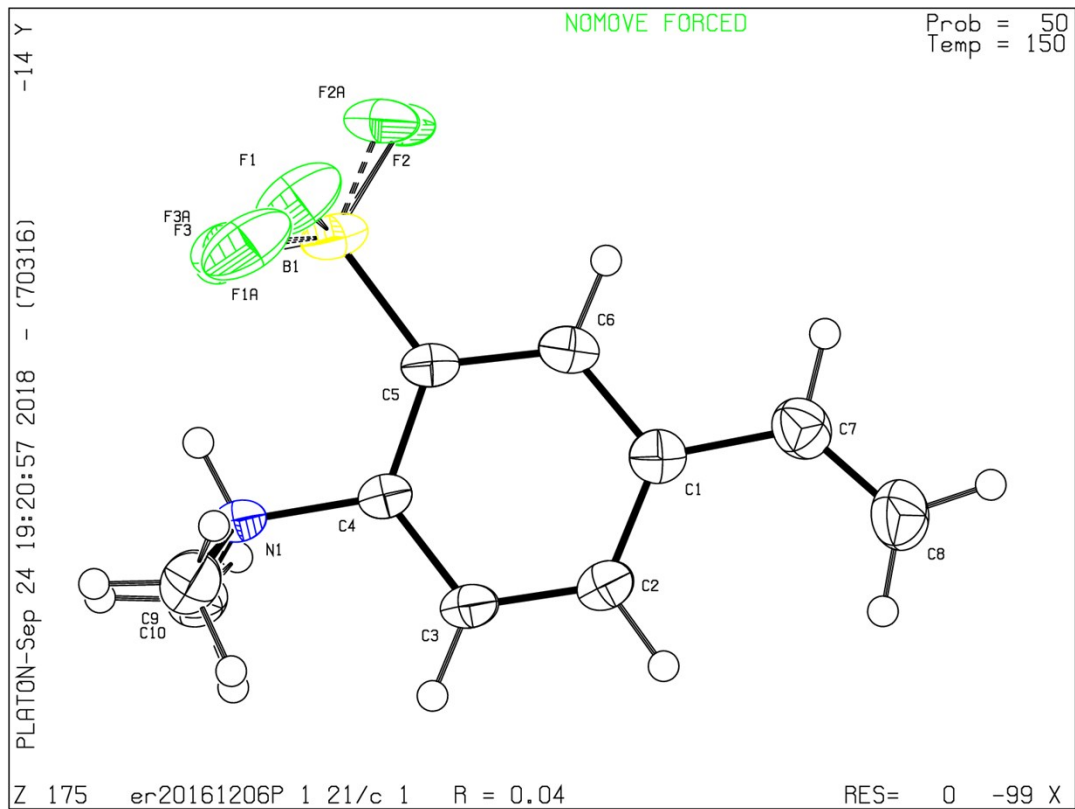

Structure of compound **3-Et**

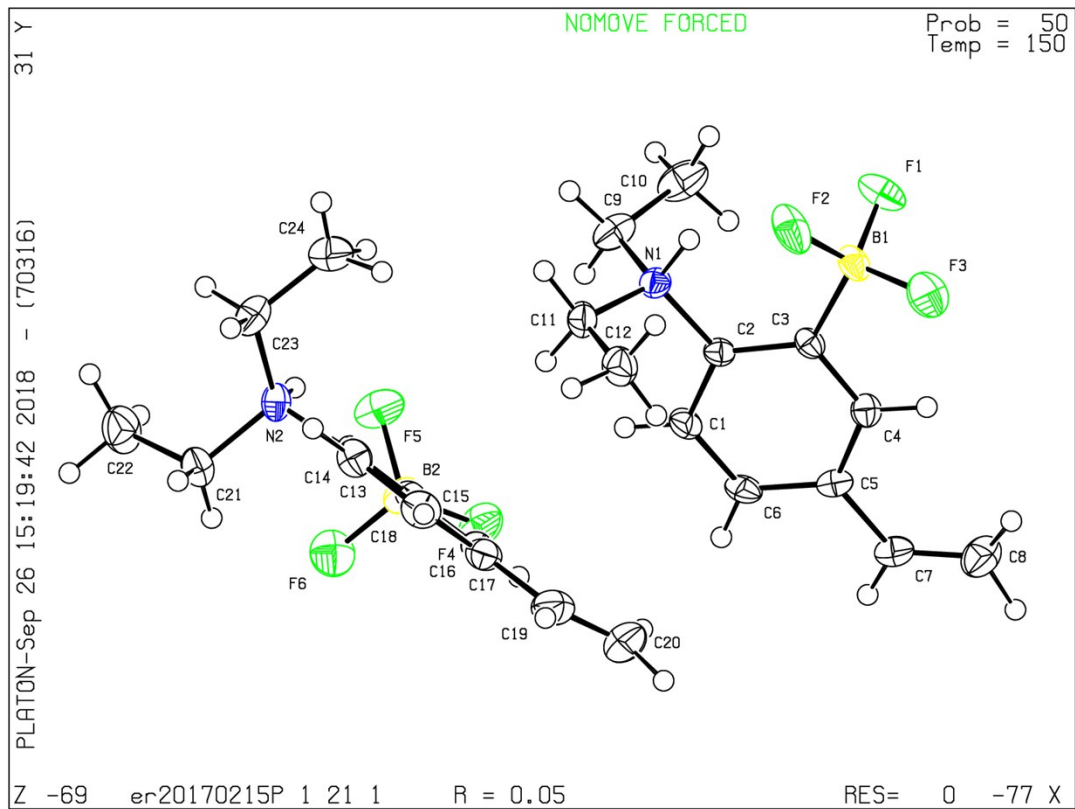

## 1.7 SEC-GPC data.

All SEC-GPC data were performed with a KF-804 column using a RI detector. The system was purged overnight with DMF/LiBr 20mM as the mobile phase. The RI detector was left on to stabilize at sensibility level 10. Baseline of the polymer peaks were normalized and analyzed with the calibration curve made with Agilent technologies High Easy vials standards (logM in function of elution time) (see figure below).  $M_w$  and  $M_n$  were calculated using statistical treatments of raw data with Excel. The flow was set to 1mL/min at c.a. 1000 psi of pressure. All samples were filtered on a 0.45  $\mu$ M PTFE filter prior to injection.

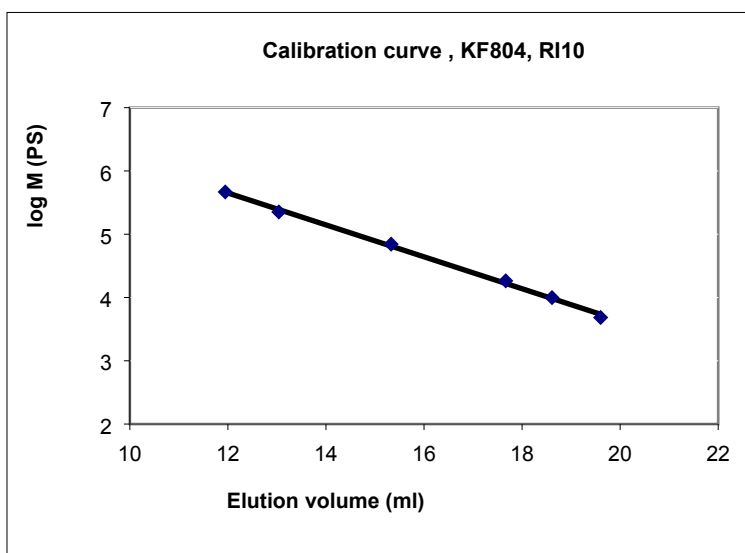

**Figure S35.** Calibration curve for SEC-GPC using polystyrene standards in DMF/LiBr (20 mM).

**Table S2.** Calibration curve raw data.

| M (PS) | V (PS) | logM (PS)  |
|--------|--------|------------|
| 465600 | 11.946 | 5.66801297 |
| 224900 | 13.039 | 5.35198946 |
| 69650  | 15.329 | 4.84292112 |
| 18340  | 17.666 | 4.26339933 |
| 9970   | 18.61  | 3.99869516 |
| 4830   | 19.602 | 3.68394713 |



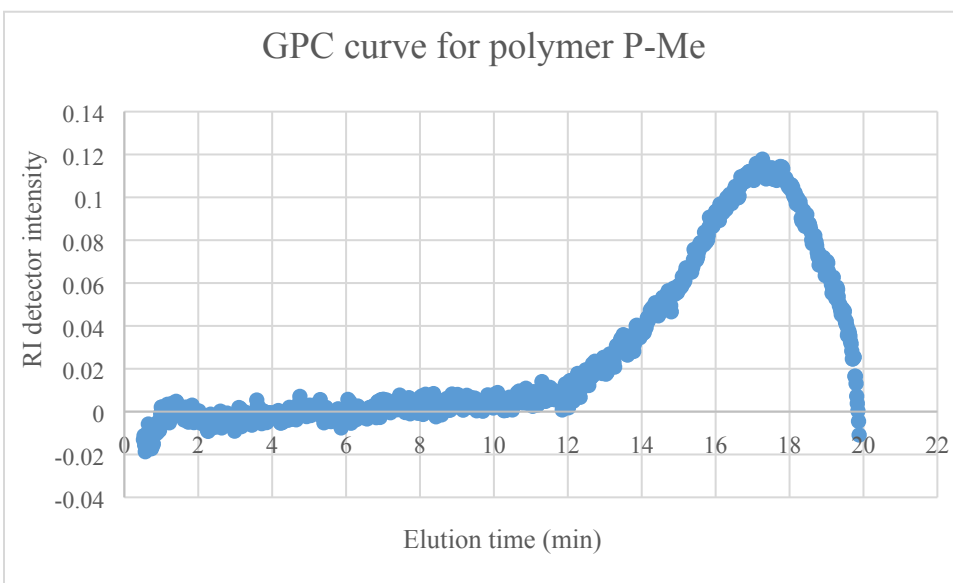

**Figure S36.** SEC-GPC chromatogram for polymer **P-Me** in DMF/Libr (20 mM).

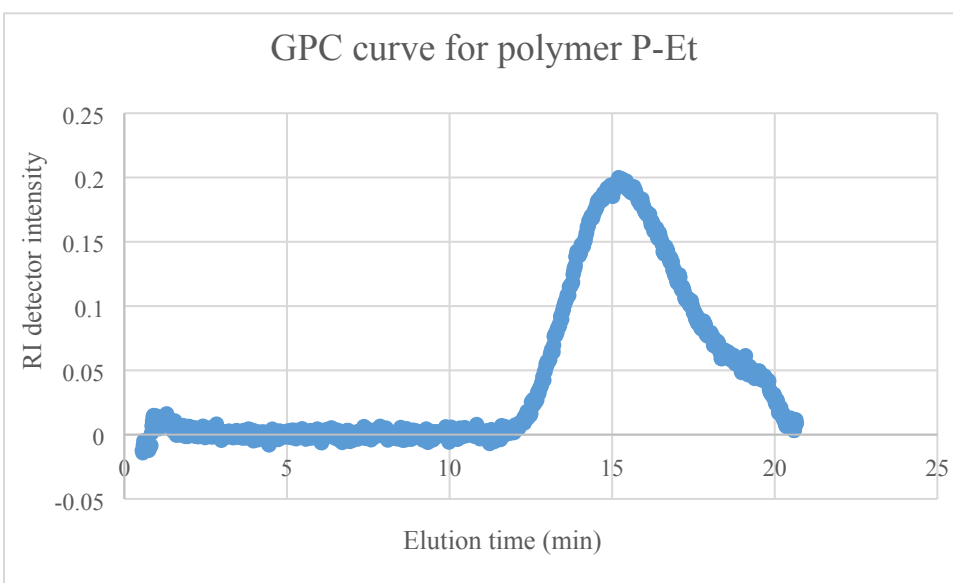

**Figure S37.** SEC-GPC chromatogram for polymer **P-Et** in DMF/Libr (20 mM).

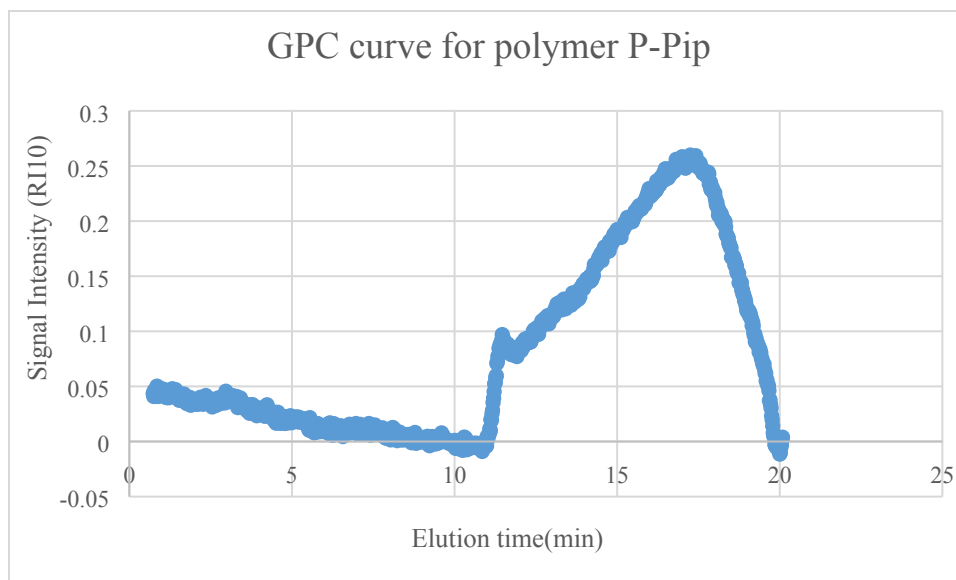

**Figure S38.** SEC-GPC chromatogram for polymer **P-Pip** in DMF/Libr (20 mM).

#### References:

- (1) Das, B.; Venkateswarlu, K.; Majhi, A.; Siddaiah, V.; Reddy, K. R. *J. Mol. Catal. A Chem.* **2007**, *267*, 30–33.
- (2) Hudlicky, M. *J. Fluor. Chem.* **1985**, *28* (4), 461–472.
- (3) (a) Légaré, M.-A.; Courtemanche, M.-A.; Rochette, É.; Fontaine, F.-G. *Science*, **2015**, *349* (6247), 513 LP – 516. (b) Légaré Lavergne, J.; Jayaraman, A.; Misal Castro, L. C.; Rochette, É.; Fontaine, F. G. *J. Am. Chem. Soc.* **2017**, *139* (41), 14714–14723. (c) Légaré, M.-A.; Rochette, É.; Légaré Lavergne, J.; Bouchard, N.; Fontaine, F.-G. *Chem. Commun.* **2016**, *52* (31), 5387–5390.
- (4) (a) E. Rochette and F.-G. Fontaine, *ChemRxiv*, 2018, DOI:10.26434/chemrxiv.7354331.v1. (b) A. Jayaraman, L. C. Misal Castro and F.-G. Fontaine, *Org. Process Res. Dev.*, 2018, **22**, 1489–1499.
